# Supplementary material for: The influence of resilience-based management on coral reef monitoring: A systematic review
Source: PubMed Central journal article supplement (PMC5302802; doi:10.1371/journal.pone.0172064), 2017-02-10
Supplement: pone.0172064.s003.pdf [file pone.0172064.s003.pdf]

**S2 Table. Original metrics used in studies and their respective classification in the three phases of analysis.** The standard metric, higher-level metric and metric categories were used in Figs 1-3 respectively.

| #  | Original metric                     | Standard metric     | Higher-level metric      | Metric Categories | Additional information on metric                                                                                                                                                                   | Reference |
|----|-------------------------------------|---------------------|--------------------------|-------------------|----------------------------------------------------------------------------------------------------------------------------------------------------------------------------------------------------|-----------|
| 1  | Latitude and longitude              | Latitude/Longitude  | Location & Geomorphology | State             |                                                                                                                                                                                                    | AGRRA     |
| 2  | Reef type                           | Reef type           | Location & Geomorphology | State             | Zones of maximum reef development are highly recommended: shallow reef crests (<5m), intermediate depth (5-15m) linear or patch reefs. Other examples are atolls, fringing and barrier reefs, etc. | AGRRA     |
| 3  | Site exposure (windward or leeward) | Site exposure       | Location & Geomorphology | State/Proxy       | Location with respect to the normal wind patterns (windward, leeward, seasonally variable) and open ocean                                                                                          | AGRRA     |
| 4  | Reef zone                           | Reef zone           | Location & Geomorphology | State             | Geomorphic zone of a reef on an insular or continental shelf: shore, bay, lagoon, intertidal crest, channel, forereef, etc.                                                                        | AGRRA     |
| 5  | Reef subtype                        | Reef subtype        | Location & Geomorphology | State             | Thicket, reticulate, coral field, rubble field, sand/mud (not a real reef)                                                                                                                         | AGRRA     |
| 6  | Angle relative to horizontal        | Slope               | Location & Geomorphology | State             | Flat, moderate slope, steep slope, wall, etc.                                                                                                                                                      | AGRRA     |
| 7  | Vertical relief                     | Relief              | Location & Geomorphology | State             |                                                                                                                                                                                                    | AGRRA     |
| 8  | Management                          | Management          | Management Status        | State/Proxy       |                                                                                                                                                                                                    | AGRRA     |
| 9  | Depth                               | Depth               | Location & Geomorphology | State             |                                                                                                                                                                                                    | AGRRA     |
| 10 | Temperature                         | Temperature         | Physical characteristics | State/Proxy       |                                                                                                                                                                                                    | AGRRA     |
| 11 | Live coral by species (or genus)    | Coral cover (genus) | Coral cover              | State             | Primary reef constructors, universal reef condition indicator                                                                                                                                      | AGRRA     |

|    |                                     |                         |                             |             |                                                                                                                                               |       |
|----|-------------------------------------|-------------------------|-----------------------------|-------------|-----------------------------------------------------------------------------------------------------------------------------------------------|-------|
| 12 | Species diversity                   | Coral diversity         | Coral community             | State       |                                                                                                                                               | AGRRA |
| 13 | Bleached coral cover                | Bleached coral cover    | Disturbance (Physiological) | State/Proxy | Indicates altered reef conditions (often thermal stress when large scale)                                                                     | AGRRA |
| 14 | Pale live coral cover               | Paling coral cover      | Disturbance (Physiological) | State/Proxy | Indicates beginning of bleaching, or beginning of recovery after having bleached                                                              | AGRRA |
| 15 | Newly dead coral cover              | Dead coral cover        | Mortality                   | State/Proxy | Indicates ongoing disease, bleaching, predation, competition, or other perturbations                                                          | AGRRA |
| 16 | CCA                                 | CCA                     | Algal cover                 | State/Proxy | Cement broken corals together to make reef framework, may indicate good conditions for coral recruits to settle                               | AGRRA |
| 17 | Newly dead CCA                      | CCA Dead                | Algal cover                 | State       |                                                                                                                                               | AGRRA |
| 18 | Calcified worm tubes                | Substrate               | Substrate                   | State       |                                                                                                                                               | AGRRA |
| 19 | Microbial and/or microalgal biofilm | Biofilm                 | Algal cover                 | State/Proxy | When corals die, skeletons quickly covered with biofilms of bacteria/microalgae, often mistaken as bare space. Coral larvae can settle here.  | AGRRA |
| 20 | Cyanobacteria cover                 | Cyanobacteria           | Algal cover                 | State       | Photosynthetic organisms that compete with corals for space on reefs, may also shelter pathogens that can kill corals                         | AGRRA |
| 21 | Sparse turf algae                   | Turf                    | Algal cover                 | State       | Eaten by many herbivorous fishes and <i>Diadema</i>                                                                                           | AGRRA |
| 22 | Turf algal mat (TAM)                | Turf algal mat          | Herbivory                   | State/Proxy | Indicates few herbivores, this prevents coral larvae from settling and overgrows corals and CCA. May also shelter pathogens that kills corals | AGRRA |
| 23 | Turf algal sediment mat             | Turf algal sediment mat | Algal cover                 | State/Proxy | Not eaten by herbivores, inhibit settlement of coral larvae, overgrow corals and CCA. May shelter pathogens that kill corals.                 | AGRRA |
| 24 | Fleshy/calcareous peyssonnelid      | Peyssonnelid            | Algal cover                 | State       | Inhibits settlement, unlike other CCA. Some species overgrow corals and CCA.                                                                  | AGRRA |
| 25 | Fleshy macroalgae                   | Macroalgae              | Algal cover                 | State/Proxy | Eaten by some herbivorous fishes, some overgrow corals and CCA, inhibit coral larvae from settling and shelter pathogens that kill corals     | AGRRA |
| 26 | Calcareous macroalgae               | Coralline algae         | Algal cover                 | State       | Eaten by some herbivorous fishes, some overgrow corals and CCA, inhibit coral larvae from settling and shelter pathogens that kill corals     | AGRRA |

|    |                                                                                                          |                                  |                     |             |                                                                                  |       |
|----|----------------------------------------------------------------------------------------------------------|----------------------------------|---------------------|-------------|----------------------------------------------------------------------------------|-------|
| 27 | Macroalgal height                                                                                        | Algal height                     | Herbivory           | State/Proxy | MA volume = cover x height, proxy for biomass, is inversely related to herbivory | AGRRA |
| 28 | Newly dead macroalgae                                                                                    | Macroalgae Dead                  | Algal cover         | State       |                                                                                  | AGRRA |
| 29 | Aggressive invertebrates<br>- <i>Cliona delitrix</i> ,<br>zoozanthebrate <i>Cliona</i>                   | Harmful organisms                | Organisms (Harmful) | State/Proxy | Kill and expand over corals and CCA as they grow                                 | AGRRA |
| 30 | Aggressive invertebrates<br>- <i>Chondrilla caribensis</i>                                               | Harmful organisms                | Organisms (Harmful) | State/Proxy | Kill and expand over corals and CCA as they grow                                 | AGRRA |
| 31 | Aggressive invertebrates<br>- <i>Millepora alcicornis</i>                                                | Harmful organisms                | Organisms (Harmful) | State/Proxy | Kill and expand over corals and CCA as they grow                                 | AGRRA |
| 32 | Aggressive invertebrates<br>- <i>Briarium asbestinum</i> ,<br><i>Erythropodium</i><br><i>caribaeorum</i> | Harmful organisms                | Organisms (Harmful) | State/Proxy | Kill and expand over corals and CCA as they grow                                 | AGRRA |
| 33 | Aggressive invertebrates<br>- <i>Palythoa caribaeorum</i> ,<br><i>Trididemnum solidum</i>                | Harmful organisms                | Organisms (Harmful) | State/Proxy | Kill and expand over corals and CCA as they grow                                 | AGRRA |
| 34 | Sessile invertebrates -<br>Epibenthic sponge                                                             | Other Invertebrates<br>(Sessile) | Other invertebrates | State       | Usually don't kill and expansively overgrow corals and CCA                       | AGRRA |
| 35 | Sessile invertebrates -<br>Gorgonian                                                                     | Other Invertebrates<br>(Sessile) | Other invertebrates | State       | Usually don't kill and expansively overgrow corals and CCA                       | AGRRA |
| 36 | Non-living - Crevice                                                                                     | Substrate                        | Substrate           | State       | Coral larvae can settle here                                                     | AGRRA |
| 37 | Non-living - Sand, mud,<br>sand-mud mix                                                                  | Substrate                        | Substrate           | State       |                                                                                  | AGRRA |
| 38 | Substratum - live coral                                                                                  | Substrate                        | Substrate           | State/Proxy | Helps characterise past history of the site                                      | AGRRA |
| 39 | Substratum - dead coral                                                                                  | Substrate                        | Substrate           | State/Proxy | Helps characterise past history of the site                                      | AGRRA |
| 40 | Substratum - coral<br>rubble, dead coral<br>boulder                                                      | Substrate                        | Substrate           | State/Proxy | Helps characterise past history of the site                                      | AGRRA |

|    |                                                            |                      |                             |             |                                                                                                                                                                             |       |
|----|------------------------------------------------------------|----------------------|-----------------------------|-------------|-----------------------------------------------------------------------------------------------------------------------------------------------------------------------------|-------|
| 41 | Substratum - carbonate pavement                            | Substrate            | Substrate                   | State/Proxy | Helps characterise past history of the site                                                                                                                                 | AGRRA |
| 42 | Small coral recruits (<2cm), large coral recruits (2-4 cm) | Juvenile corals      | Recruitment                 | State/Proxy | Recruits are counted to learn if reefs might be able to recover when disasters kill adult corals                                                                            | AGRRA |
| 43 | <i>Diadema antillarum</i> (juvenile and adult)             | Urchin               | Herbivory                   | State/Proxy | Formerly a key herbivore on many W. Atlantic reefs                                                                                                                          | AGRRA |
| 44 | Spiny lobsters                                             | Motile invertebrates | Other invertebrates         | State       | Overfished across much of the W. Atlantic                                                                                                                                   | AGRRA |
| 45 | Live queen conch                                           | Motile invertebrates | Other invertebrates         | State/Proxy | Usually seen only on reefs that have not been overfished                                                                                                                    | AGRRA |
| 46 | Lionfish                                                   | Lionfish             | Disturbance (Biological)    | State/Proxy | Invasive and predatory, preying upon and competing with many native species                                                                                                 | AGRRA |
| 47 | Trash                                                      | Garbage              | Disturbance (Anthropogenic) | State/Proxy | Discards reflect human behaviour and activity e.g. boating, fishing, drinking                                                                                               | AGRRA |
| 48 | Coral disease                                              | Disease              | Disturbance (Physiological) | State/Proxy |                                                                                                                                                                             | AGRRA |
| 49 | Coral size                                                 | Coral size           | Coral community             | State/Proxy | Small corals likely to be completely killed by perturbations. A reef without large corals may be recovering from a serious perturbation, one without recruits has no future | AGRRA |
| 50 | Fish abundance (Selected functional group)                 | Fish abundance (key) | Fish abundance              | State       |                                                                                                                                                                             | AGRRA |
| 51 | Fish abundance (Selected species)                          | Fish abundance (key) | Fish abundance              | State       |                                                                                                                                                                             | AGRRA |
| 52 | Fish size frequency distribution (selected species)        | Fish size (key)      | Fish size                   | State       |                                                                                                                                                                             | AGRRA |
| 53 | Fish diversity                                             | Fish diversity       | Fish community              | State       |                                                                                                                                                                             | AGRRA |

|    |                                     |                      |                             |             |                                                                                                                              |           |
|----|-------------------------------------|----------------------|-----------------------------|-------------|------------------------------------------------------------------------------------------------------------------------------|-----------|
| 54 | Herbivorous fish biomass (species)  | Herbivore biomass    | Herbivory                   | State/Proxy |                                                                                                                              | AGRRA     |
| 55 | Fish biomass (estimated)            | Fish biomass         | Fish biomass                | State/Proxy | Total fish biomass gives important information on trophic structure and overall reproductive output of fish                  | AGRRA     |
| 56 | Commerical fish biomass (estimated) | Fish biomass         | Fish biomass                | State/Proxy | Total commercial fish biomass gives indication of stock status, fishing pressure, habitat conditions and recruitment success | AGRRA     |
| 57 | Crustose coralline algae cover      | CCA                  | Algal cover                 | State       |                                                                                                                              | AIMS LTMP |
| 58 | Macroalgae cover                    | Macroalgae           | Algal cover                 | State       |                                                                                                                              | AIMS LTMP |
| 59 | Turf algae cover                    | Turf                 | Algal cover                 | State       |                                                                                                                              | AIMS LTMP |
| 60 | <i>Halimeda</i>                     | Coralline algae      | Algal cover                 | State       |                                                                                                                              | AIMS LTMP |
| 61 | Bleached coral cover                | Bleached coral cover | Disturbance (Physiological) | State/Proxy |                                                                                                                              | AIMS LTMP |
| 62 | Giant clam abundance                | Motile invertebrates | Other invertebrates         | State       |                                                                                                                              | AIMS LTMP |
| 63 | Coral cover (Genus)                 | Coral cover (genus)  | Coral cover                 | State       |                                                                                                                              | AIMS LTMP |
| 64 | Dead coral cover                    | Dead coral cover     | Coral cover                 | State       |                                                                                                                              | AIMS LTMP |
| 65 | Hard coral cover                    | Coral cover          | Coral cover                 | State       |                                                                                                                              | AIMS LTMP |
| 66 | COTS abundance                      | COTS                 | Disturbance (Biological)    | State/Proxy |                                                                                                                              | AIMS LTMP |
| 67 | COTS size class distribution        | COTS                 | Disturbance (Biological)    | State/Proxy |                                                                                                                              | AIMS LTMP |
| 68 | Presence of feeding scars           | Feeding scars        | Disturbance (Biological)    | State/Proxy |                                                                                                                              | AIMS LTMP |
| 69 | Coral disease                       | Disease              | Disturbance                 | State/Proxy |                                                                                                                              | AIMS LTMP |

|    |                                                     |                               |                             |             |                                                                                                                                        |           |
|----|-----------------------------------------------------|-------------------------------|-----------------------------|-------------|----------------------------------------------------------------------------------------------------------------------------------------|-----------|
|    |                                                     |                               | (Physiological)             |             |                                                                                                                                        |           |
| 70 | Total fish abundance                                | Total fish abundance          | Fish abundance              | State       |                                                                                                                                        | AIMS LTMP |
| 71 | Fish diversity                                      | Fish diversity                | Fish community              | State       |                                                                                                                                        | AIMS LTMP |
| 72 | Fish size frequency distribution (Selected species) | Fish size (key)               | Fish size                   | State       |                                                                                                                                        | AIMS LTMP |
| 73 | Soft coral cover                                    | Other Invertebrates (Sessile) | Other invertebrates         | State       |                                                                                                                                        | AIMS LTMP |
| 74 | Sponge cover                                        | Other Invertebrates (Sessile) | Other invertebrates         | State       |                                                                                                                                        | AIMS LTMP |
| 75 | Visibility                                          | Turbidity                     | Physical characteristics    | State/Proxy | Water visibility estimates recorded.                                                                                                   | AIMS LTMP |
| 76 | Tide                                                | Tide                          | Physical characteristics    | State       | Tide recorded as low, high, falling or rising, determined from a tide table.                                                           | AIMS LTMP |
| 77 | Cloud cover                                         | Cloud cover                   | Physical characteristics    | State       | Quantified in terms of eighths of the sky area covered by cloud. Unit = okta. One okta means 1/8 of the sky.                           | AIMS LTMP |
| 78 | Wind strength                                       | Wind                          | Physical characteristics    | State/Proxy | 5 categories from 0-25 knots.                                                                                                          | AIMS LTMP |
| 79 | Disease                                             | Disease                       | Disturbance (Physiological) | State/Proxy | Presence/absence                                                                                                                       | AIMS LTMP |
| 80 | Cyclones                                            | Storm                         | Disturbance (Physical)      | State/Proxy | Presence/absence                                                                                                                       | AIMS LTMP |
| 81 | Abiotic cover                                       | Substrate                     | Substrate                   | State       |                                                                                                                                        | AIMS LTMP |
| 82 | Juvenile corals                                     | Juvenile corals               | Recruitment                 | State/Proxy | Up to 5cm are surveyed. Juvenile corals are the net result of processes of larval supply, settlement and post-settlement survivorship. | AIMS LTMP |
| 83 | Total Carbon                                        | Carbon                        | Disturbance                 | State/Proxy |                                                                                                                                        | AIMS LTMP |

|    |                               |                               |                             |             |  |               |
|----|-------------------------------|-------------------------------|-----------------------------|-------------|--|---------------|
|    |                               |                               | (Anthropogenic)             |             |  |               |
| 84 | Total Nitrogen                | Nitrogen                      | Disturbance (Anthropogenic) | State/Proxy |  | AIMS LTMP     |
| 85 | Temperature                   | Temperature                   | Physical characteristics    | State/Proxy |  | AIMS LTMP     |
| 86 | Suspended solids              | Turbidity                     | Physical characteristics    | State/Proxy |  | AIMS LTMP     |
| 87 | Salinity                      | Salinity                      | Physical characteristics    | State       |  | AIMS LTMP     |
| 88 | Chlorophyll-a                 | Chlorophyll                   | Disturbance (Anthropogenic) | State/Proxy |  | AIMS LTMP     |
| 89 | Fleshy macroalgae             | Macroalgae                    | Algal cover                 | State       |  | Bruckner 2012 |
| 90 | Erect coralline algae         | Coralline algae               | Algal cover                 | State       |  | Bruckner 2012 |
| 91 | Crustose coralline algae      | CCA                           | Algal cover                 | State       |  | Bruckner 2012 |
| 92 | Turf algae                    | Turf                          | Algal cover                 | State       |  | Bruckner 2012 |
| 93 | Cyanobacteria                 | Cyanobacteria                 | Algal cover                 | State       |  | Bruckner 2012 |
| 94 | Coral cover (species)         | Coral cover (species)         | Coral cover                 | State       |  | Bruckner 2012 |
| 95 | Coral diversity               | Coral diversity               | Coral community             | State       |  | Bruckner 2012 |
| 96 | Coral size class distribution | Coral size                    | Coral community             | State/Proxy |  | Bruckner 2012 |
| 97 | Tunicate                      | Other Invertebrates (Sessile) | Other invertebrates         | State       |  | Bruckner 2012 |
| 98 | Gorgonian                     | Other Invertebrates (Sessile) | Other invertebrates         | State       |  | Bruckner 2012 |

|     |                                                                             |                               |                             |             |                                                                                                                                                                                                                                                      |               |
|-----|-----------------------------------------------------------------------------|-------------------------------|-----------------------------|-------------|------------------------------------------------------------------------------------------------------------------------------------------------------------------------------------------------------------------------------------------------------|---------------|
| 99  | Anemones                                                                    | Other Invertebrates (Sessile) | Other invertebrates         | State       |                                                                                                                                                                                                                                                      | Bruckner 2012 |
| 100 | Bioeroding sponges                                                          | Other Invertebrates (Sessile) | Other invertebrates         | State       |                                                                                                                                                                                                                                                      | Bruckner 2012 |
| 101 | Hydrozoan coral ( <i>Millepora</i> )                                        | Other Invertebrates (Sessile) | Other invertebrates         | State       |                                                                                                                                                                                                                                                      | Bruckner 2012 |
| 102 | Pavement                                                                    | Substrate                     | Substrate                   | State       |                                                                                                                                                                                                                                                      | Bruckner 2012 |
| 103 | Rubble                                                                      | Substrate                     | Substrate                   | State       |                                                                                                                                                                                                                                                      | Bruckner 2012 |
| 104 | Sand/Silt                                                                   | Substrate                     | Substrate                   | State       |                                                                                                                                                                                                                                                      | Bruckner 2012 |
| 105 | Recently dead coral cover (Coral condition)                                 | Dead coral cover              | Mortality                   | State/Proxy | Visual estimates of tissue loss                                                                                                                                                                                                                      | Bruckner 2012 |
| 106 | Transitional dead coral cover (Coral condition)                             | Dead coral cover              | Coral cover                 | State       | Visual estimates of tissue loss                                                                                                                                                                                                                      | Bruckner 2012 |
| 107 | Old dead coral cover (Coral condition)                                      | Dead coral cover              | Coral cover                 | State       | Visual estimates of tissue loss                                                                                                                                                                                                                      | Bruckner 2012 |
| 108 | Cause of mortality                                                          | Cause of mortality            | Mortality                   | State/Proxy | Assessment of type of disease, extent of bleaching, predation, competition, overgrowth or other cause of mortality                                                                                                                                   | Bruckner 2012 |
| 109 | Juvenile corals                                                             | Juvenile corals               | Recruitment                 | State/Proxy | Sampling for corals smaller than 4cm, divided into 2 classes                                                                                                                                                                                         | Bruckner 2012 |
| 110 | Settlement location                                                         | Settlement location           | Recruitment                 | State/Proxy | Found <i>M. annularis</i> skeletons promoted settlement.                                                                                                                                                                                             | Bruckner 2012 |
| 111 | Longitude/latitude                                                          | Latitude/Longitude            | Location & Geomorphology    | State       |                                                                                                                                                                                                                                                      | Bruckner 2012 |
| 112 | Key nuisance invertebrates (Sponge, gorgonian, bioeroding sponge, tunicate) | Harmful organisms             | Organisms (Harmful)         | State/Proxy | Nuisance species: tunicate ( <i>Tredidennum</i> ), encrusting gorgonian ( <i>Erythropodium</i> , <i>Briareum</i> ), colonial anemone ( <i>Palythoa</i> ), encrusting or bioeroding sponge ( <i>Cliona</i> ) and hydrozoan coral ( <i>Millepora</i> ) | Bruckner 2012 |
| 113 | Disease                                                                     | Disease                       | Disturbance (Physiological) | State/Proxy |                                                                                                                                                                                                                                                      | Bruckner 2012 |



|     |                                |                               |                             |             |  |          |
|-----|--------------------------------|-------------------------------|-----------------------------|-------------|--|----------|
| 114 | Bleached coral cover           | Bleached coral cover          | Disturbance (Physiological) | State/Proxy |  | CARICOMP |
| 115 | Algal biomass (Select species) | Algal biomass                 | Algal biomass               | State/Proxy |  | CARICOMP |
| 116 | Calcareous algae               | Coralline algae               | Algal cover                 | State       |  | CARICOMP |
| 117 | Encrusting calcareous algae    | CCA                           | Algal cover                 | State       |  | CARICOMP |
| 118 | Fleshy Algae                   | Macroalgae                    | Algal cover                 | State       |  | CARICOMP |
| 119 | Turf algae                     | Turf                          | Algal cover                 | State       |  | CARICOMP |
| 120 | Anemones                       | Other Invertebrates (Sessile) | Other invertebrates         | State       |  | CARICOMP |
| 121 | Ascidians                      | Other Invertebrates (Sessile) | Other invertebrates         | State       |  | CARICOMP |
| 122 | Branching corals               | Coral cover (growth form)     | Coral community             | State/Proxy |  | CARICOMP |
| 123 | Massive corals                 | Coral cover (growth form)     | Coral community             | State/Proxy |  | CARICOMP |
| 124 | Encrusting corals              | Coral cover (growth form)     | Coral community             | State/Proxy |  | CARICOMP |
| 125 | Foliaceous corals              | Coral cover (growth form)     | Coral community             | State/Proxy |  | CARICOMP |
| 126 | Milleporines                   | Other Invertebrates (Sessile) | Other invertebrates         | State       |  | CARICOMP |
| 127 | Recently dead coral            | Dead coral cover              | Mortality                   | State/Proxy |  | CARICOMP |
| 128 | Hard coral                     | Coral cover                   | Coral cover                 | State       |  | CARICOMP |
| 129 | Coral disease                  | Disease                       | Disturbance                 | State/Proxy |  | CARICOMP |

|     |                                             |                               |                          |             |  |          |
|-----|---------------------------------------------|-------------------------------|--------------------------|-------------|--|----------|
|     |                                             |                               | (Physiological)          |             |  |          |
| 130 | Corallimorpharians                          | Other Invertebrates (Sessile) | Other invertebrates      | State       |  | CARICOMP |
| 131 | Fish size frequency distribution by species | Fish size (species)           | Fish size                | State       |  | CARICOMP |
| 132 | Fish abundance (Selected species)           | Fish abundance (key)          | Fish abundance           | State       |  | CARICOMP |
| 133 | Fish diversity (Species)                    | Fish diversity                | Fish community           | State       |  | CARICOMP |
| 134 | Gorgonians (Growth form)                    | Other Invertebrates (Sessile) | Other invertebrates      | State       |  | CARICOMP |
| 135 | Encrusting gorgonians                       | Other Invertebrates (Sessile) | Other invertebrates      | State       |  | CARICOMP |
| 136 | Bare boulders                               | Substrate                     | Substrate                | State       |  | CARICOMP |
| 137 | Bare rock                                   | Substrate                     | Substrate                | State       |  | CARICOMP |
| 138 | Bare rubble                                 | Substrate                     | Substrate                | State       |  | CARICOMP |
| 139 | Bare sediment                               | Substrate                     | Substrate                | State       |  | CARICOMP |
| 140 | Holes, gaps, overhangs                      | Substrate                     | Substrate                | State       |  | CARICOMP |
| 141 | Depth                                       | Depth                         | Location & Geomorphology | State       |  | CARICOMP |
| 142 | Latitude and longitude                      | Latitude/Longitude            | Location & Geomorphology | State       |  | CARICOMP |
| 143 | Rugosity                                    | Rugosity                      | Location & Geomorphology | State/Proxy |  | CARICOMP |
| 144 | Erect sponges                               | Other Invertebrates (Sessile) | Other invertebrates      | State       |  | CARICOMP |

|     |                                        |                               |                             |             |                                                                                                                                                                                                                                |                    |
|-----|----------------------------------------|-------------------------------|-----------------------------|-------------|--------------------------------------------------------------------------------------------------------------------------------------------------------------------------------------------------------------------------------|--------------------|
| 145 | Encrusting sponges                     | Other Invertebrates (Sessile) | Other invertebrates         | State       |                                                                                                                                                                                                                                | CARICOMP           |
| 146 | Sea surface temperature                | Temperature                   | Physical characteristics    | State/Proxy |                                                                                                                                                                                                                                | CARICOMP           |
| 147 | Urchin abundance (Species)             | Urchin                        | Other invertebrates         | State/Proxy |                                                                                                                                                                                                                                | CARICOMP           |
| 148 | Urchin abundance (juvenile)            | Urchin                        | Other invertebrates         | State/Proxy |                                                                                                                                                                                                                                | CARICOMP           |
| 149 | Urchin abundance (adult)               | Urchin                        | Other invertebrates         | State/Proxy |                                                                                                                                                                                                                                | CARICOMP           |
| 150 | Sea urchin density                     | Urchin                        | Herbivory                   | State/Proxy | As a key herbivore, potential of organism to reach high densities will change algal cover.                                                                                                                                     | CARICOMP           |
| 151 | Sea urchin size class distribution     | Urchin                        | Other invertebrates         | State/Proxy |                                                                                                                                                                                                                                | CARICOMP           |
| 152 | Salinity                               | Salinity                      | Physical characteristics    | State       |                                                                                                                                                                                                                                | CARICOMP           |
| 153 | Turbidity                              | Turbidity                     | Physical characteristics    | State/Proxy |                                                                                                                                                                                                                                | CARICOMP           |
| 154 | Zoanthids                              | Other Invertebrates (Sessile) | Other invertebrates         | State       |                                                                                                                                                                                                                                | Cinner et al. 2013 |
| 155 | Ecological exposure to coral bleaching | Thermal regime                | Disturbance (Physiological) | Process     | Multivariate model of how variables combine to create environmental conditions that make a site susceptible to coral bleaching impacts including temperature, lights, currents, tidal variation, chlorophyll and water quality | Cinner et al. 2013 |
| 156 | Temperature                            | Temperature                   | Physical characteristics    | State/Proxy | Variable included in the multivariate model that produces ecological exposure resilience index                                                                                                                                 | Cinner et al. 2013 |
| 157 | Light                                  | Light                         | Physical characteristics    | State/Proxy | Variable included in the multivariate model that produces ecological exposure resilience index                                                                                                                                 | Cinner et al. 2013 |
| 158 | Currents                               | Current                       | Physical characteristics    | Proxy       | Variable included in the multivariate model that produces ecological exposure resilience index                                                                                                                                 | Cinner et al. 2013 |

|     |                                                                                                         |                     |                             |             |                                                                                                                                |                    |
|-----|---------------------------------------------------------------------------------------------------------|---------------------|-----------------------------|-------------|--------------------------------------------------------------------------------------------------------------------------------|--------------------|
| 159 | Tidal variation                                                                                         | Tide                | Physical characteristics    | State/Proxy | Variable included in the multivariate model that produces ecological exposure resilience index                                 | Cinner et al. 2013 |
| 160 | Chlorophyll-a                                                                                           | Chlorophyll         | Disturbance (Anthropogenic) | State/Proxy | Variable included in the multivariate model that produces ecological exposure resilience index                                 | Cinner et al. 2013 |
| 161 | Water quality                                                                                           | Water quality       | Disturbance (Anthropogenic) | State/Proxy | Variable included in the multivariate model that produces ecological exposure resilience index                                 | Cinner et al. 2013 |
| 162 | Susceptibility of the coral community to bleaching                                                      | Bleaching           | Disturbance (Physiological) | Process     |                                                                                                                                | Cinner et al. 2013 |
| 163 | Susceptibility of the fish community to population declines associated with habitat loss from bleaching | Bleaching           | Disturbance (Physiological) | Process     |                                                                                                                                | Cinner et al. 2013 |
| 164 | Hard coral cover                                                                                        | Coral cover         | Coral cover                 | State       | Linked to increase resilience and recovery but most studies show no correlation                                                | Cinner et al. 2013 |
| 165 | Ratio of coral to macroalgal cover                                                                      | Coral-algal balance | Competition                 | State/Proxy |                                                                                                                                | Cinner et al. 2013 |
| 166 | Macroalgae cover                                                                                        | Macroalgae          | Algal cover                 | State/Proxy | Limit coral recovery via competition for benthic substrate, allelopathy and trapping sediment that smothers coral recruits     | Cinner et al. 2013 |
| 167 | Coral size distribution                                                                                 | Coral size          | Coral community             | State/Proxy | Evidence that evenness across size classes increases recovery. Lack of large adult colonies may limit spawning stock.          | Cinner et al. 2013 |
| 168 | Coral richness                                                                                          | Coral diversity     | Coral community             | State       | Expected to promote recovery, but limited evidence.                                                                            | Cinner et al. 2013 |
| 169 | Fish biomass (estimated)                                                                                | Fish biomass        | Fish biomass                | State/Proxy | Indicates status of fish stock, it's potential growth and a proxy for ecological metabolism                                    | Cinner et al. 2013 |
| 170 | Fish species richness                                                                                   | Fish diversity      | Fish community              | State/Proxy | Often used as proxy for functional redundancy, expected to promote ecological recovery by avoiding undesired ecological states | Cinner et al. 2013 |
| 171 | Fish size distribution                                                                                  | Fish size           | Fish size                   | State/Proxy | Large individuals can increase fecundity to promote recovery of fish communities                                               | Cinner et al. 2013 |
| 172 | Substrate complexity                                                                                    | Rugosity            | Location & Geomorphology    | State/Proxy |                                                                                                                                | Cinner et al. 2013 |

|     |                                                         |                          |                          |             |                                                                                                                                                                     |                    |
|-----|---------------------------------------------------------|--------------------------|--------------------------|-------------|---------------------------------------------------------------------------------------------------------------------------------------------------------------------|--------------------|
| 173 | Herbivore diversity                                     | Herbivore diversity      | Fish community           | State/Proxy |                                                                                                                                                                     | Cinner et al. 2013 |
| 174 | Index of herbivore grazing relative to algal production | Grazing/Algal Production | Herbivory                | Proxy       |                                                                                                                                                                     | Cinner et al. 2013 |
| 175 | Latitude and longitude                                  | Latitude/Longitude       | Location & Geomorphology | State       |                                                                                                                                                                     | Cinner et al. 2013 |
| 176 | Depth                                                   | Depth                    | Location & Geomorphology | State       |                                                                                                                                                                     | Cinner et al. 2013 |
| 177 | Calcifying to non-calcifying cover                      | Substrate availability   | Substrate                | State/Proxy | Calcifying organisms important for reef framework e.g. settlement, recruitment and cementation of reef structure, expect to increase recovery following disturbance | Cinner et al. 2013 |
| 178 | CCA cover                                               | CCA                      | Algal cover              | State       |                                                                                                                                                                     | CRAMP              |
| 179 | Cyanobacteria cover                                     | Cyanobacteria            | Algal cover              | State       |                                                                                                                                                                     | CRAMP              |
| 180 | Fleshy macroalgae                                       | Macroalgae               | Algal cover              | State       |                                                                                                                                                                     | CRAMP              |
| 181 | Macroalgae                                              | Macroalgae               | Algal cover              | State       |                                                                                                                                                                     | CRAMP              |
| 182 | Turf cover                                              | Turf                     | Algal cover              | State       |                                                                                                                                                                     | CRAMP              |
| 183 | Coral cover (Species)                                   | Coral cover (species)    | Coral cover              | State       |                                                                                                                                                                     | CRAMP              |
| 184 | Coral mortality                                         | Coral mortality          | Mortality                | Process     |                                                                                                                                                                     | CRAMP              |
| 185 | Coral richness                                          | Coral diversity          | Coral community          | State       |                                                                                                                                                                     | CRAMP              |
| 186 | Total fish abundance                                    | Total fish abundance     | Fish abundance           | State       |                                                                                                                                                                     | CRAMP              |
| 187 | Total fish biomass                                      | Fish biomass             | Fish biomass             | State/Proxy |                                                                                                                                                                     | CRAMP              |
| 188 | Fish size class distribution                            | Fish size                | Fish size                | State       |                                                                                                                                                                     | CRAMP              |

|     |                                       |                         |                             |             |                                                                                                                                           |                    |
|-----|---------------------------------------|-------------------------|-----------------------------|-------------|-------------------------------------------------------------------------------------------------------------------------------------------|--------------------|
| 189 | Sediment size                         | Sediment size           | Physical characteristics    | State/Proxy | Used as an indicator of the environment and provide a characterisation of the benthos, suppling information about benthic structure       | CRAMP              |
| 190 | Coral recruitment                     | Juvenile corals         | Recruitment                 | State/Proxy |                                                                                                                                           | CRAMP              |
| 191 | Depth                                 | Depth                   | Location & Geomorphology    | State       |                                                                                                                                           | CRAMP              |
| 192 | Latitude and longitude                | Latitude/Longitude      | Location & Geomorphology    | State       |                                                                                                                                           | CRAMP              |
| 193 | Rugosity                              | Rugosity                | Location & Geomorphology    | State/Proxy | More habitat for coral reef organisms, and proxy for fish abundance                                                                       | CRAMP              |
| 194 | Nutrients                             | Nutrients               | Disturbance (Anthropogenic) | State/Proxy |                                                                                                                                           | CRAMP              |
| 195 | Percent Carbon                        | Carbon                  | Disturbance (Anthropogenic) | State/Proxy |                                                                                                                                           | CRAMP              |
| 196 | Percent Nitrogen                      | Nitrogen                | Disturbance (Anthropogenic) | State/Proxy |                                                                                                                                           | CRAMP              |
| 197 | Wave exposure                         | Wave exposure           | Physical characteristics    | Proxy       |                                                                                                                                           | CRAMP              |
| 198 | Conservation status                   | Management              | Management Status           | State/Proxy |                                                                                                                                           | CRAMP              |
| 199 | Habitat                               | Habitat                 | Location & Geomorphology    | State       |                                                                                                                                           | CRAMP              |
| 200 | Sand/Silt/Bare/Rock                   | Substrate               | Substrate                   | State       |                                                                                                                                           | CRAMP              |
| 201 | Habitat type                          | Habitat                 | Location & Geomorphology    | State       | 3 types: carbonate fringing, granitic rocky and patch reef. Habitats differ in coral recruitment success/likelihood of ecosystem collapse | Graham et al. 2015 |
| 202 | Pre-disturbance branching coral cover | Coral cover (branching) | Coral cover                 | State/Proxy | Branching vulnerable to bleaching, and once dead erodes quickly. More branching vulnerable to coral loss and reduction in organisms       | Graham et al. 2015 |
| 203 | Juvenile coral density                | Juvenile corals         | Recruitment                 | State/Proxy | Proxy for successful recruitment, survival and growth of new corals, assumed to be key to coral recovery dynamics                         | Graham et al. 2015 |

|     |                                                       |                               |                             |             |                                                                                                                                                                 |                    |
|-----|-------------------------------------------------------|-------------------------------|-----------------------------|-------------|-----------------------------------------------------------------------------------------------------------------------------------------------------------------|--------------------|
| 204 | Depth                                                 | Depth                         | Location & Geomorphology    | State/Proxy | Threats on reefs are mostly in shallow water, light penetration also favour rapid growth of macroalgae                                                          | Graham et al. 2015 |
| 205 | Herbivorous fish biomass                              | Herbivore biomass             | Herbivory                   | State/Proxy | Good proxy for function as the area of reef grazed by fish to mediate competition for space among coral and algae                                               | Graham et al. 2015 |
| 206 | Herbivorous fish diversity                            | Herbivore diversity           | Fish community              | State/Proxy | Many types of algae have defences against herbivores, proxy for effective control of macroalgae                                                                 | Graham et al. 2015 |
| 207 | Marine reserve status                                 | Management                    | Management Status           | State/Proxy | No take reserves expect to reduce fishing and enhance ecosystem processes                                                                                       | Graham et al. 2015 |
| 208 | Nutrient regime                                       | Nutrients                     | Disturbance (Anthropogenic) | State/Proxy | High nutrient loads enhance growth of algae, resulting in algae outcompeting corals                                                                             | Graham et al. 2015 |
| 209 | Pre-disturbance structural complexity                 | Rugosity                      | Location & Geomorphology    | State/Proxy | Provide refuge, and space for coral settlement and larvae. Prior to a disturbance, expect to maintain ecosystem processes through a disturbance                 | Graham et al. 2015 |
| 210 | Sea urchin density                                    | Urchin                        | Herbivory                   | State/Proxy | Sea urchins important herbivores to control algal growth, promote successful recruitment and recovery                                                           | Graham et al. 2015 |
| 211 | Proximity to upwelling or exposure to strong currents | Upwelling                     | Physical characteristics    | State/Proxy | Wave exposure influence distribution patterns, growth forms and colony sizes. Also enhance algal growth rates, and dislodge algae where wave exposure is strong | Graham et al. 2015 |
| 212 | Coral cover (species)                                 | Coral cover (species)         | Coral cover                 | State       |                                                                                                                                                                 | CREMP              |
| 213 | Coral richness                                        | Coral diversity               | Coral community             | State       |                                                                                                                                                                 | CREMP              |
| 214 | Octocoral cover (Gorgonian and soft coral)            | Other Invertebrates (Sessile) | Other invertebrates         | State       |                                                                                                                                                                 | CREMP              |
| 215 | Zoanthid cover                                        | Other Invertebrates (Sessile) | Other invertebrates         | State       |                                                                                                                                                                 | CREMP              |
| 216 | Sponge cover                                          | Other Invertebrates (Sessile) | Other invertebrates         | State       |                                                                                                                                                                 | CREMP              |
| 217 | Seagrass cover                                        | Seagrass                      | Seagrass                    | State       |                                                                                                                                                                 | CREMP              |

|     |                           |                      |                             |             |                                                                                                                         |                      |
|-----|---------------------------|----------------------|-----------------------------|-------------|-------------------------------------------------------------------------------------------------------------------------|----------------------|
| 218 | Macroalgae cover          | Macroalgae           | Algal cover                 | State       |                                                                                                                         | CREMP                |
| 219 | Cyanobacteria cover       | Cyanobacteria        | Algal cover                 | State       | Monitored in datasheets.                                                                                                | CREMP                |
| 220 | Clionid sponge cover      | Harmful organisms    | Organisms (Harmful)         | State/Proxy |                                                                                                                         | CREMP                |
| 221 | Bleached coral cover      | Bleached coral cover | Disturbance (Physiological) | State/Proxy |                                                                                                                         | CREMP                |
| 222 | Disease                   | Disease              | Disturbance (Physiological) | State/Proxy |                                                                                                                         | CREMP                |
| 223 | Habitat                   | Habitat              | Location & Geomorphology    | State       | Four main habitat types: nearshore hardbottom, patch reefs, offshore shallow reefs and offshore deep reefs              | CREMP                |
| 224 | Temperature               | Temperature          | Physical characteristics    | State/Proxy |                                                                                                                         | CREMP                |
| 225 | Diadema abundance/density | Urchin               | Other invertebrates         | State/Proxy |                                                                                                                         | CREMP                |
| 226 | Grazer biomass            | Herbivore biomass    | Herbivory                   | State/Proxy | Grazer crop on algal turf, prevent the establishment and growth of macroalgae                                           | Jouffray et al. 2015 |
| 227 | Scraper biomass           | Herbivore biomass    | Herbivory                   | State/Proxy | Scrapers also feed on turf but remove some component of the reef substratum, providing bare areas for coral recruitment | Jouffray et al. 2015 |
| 228 | Browser biomass           | Herbivore biomass    | Herbivory                   | State/Proxy | Browsers consistently feed on macroalgae, may play a crucial role for reversing macroalgae-dominated states             | Jouffray et al. 2015 |
| 229 | Latitude                  | Latitude/Longitude   | Location & Geomorphology    | State       |                                                                                                                         | Jouffray et al. 2015 |
| 230 | Depth                     | Depth                | Location & Geomorphology    | State       |                                                                                                                         | Jouffray et al. 2015 |
| 231 | Distance from coast       | Distance from coast  | Disturbance (Anthropogenic) | Proxy       |                                                                                                                         | Jouffray et al. 2015 |
| 232 | Distance from stream      | Distance from stream | Disturbance (Anthropogenic) | Proxy       |                                                                                                                         | Jouffray et al. 2015 |



|     |                                             |                          |                             |             |                                                                                                                                      |                      |
|-----|---------------------------------------------|--------------------------|-----------------------------|-------------|--------------------------------------------------------------------------------------------------------------------------------------|----------------------|
| 233 | Effluent                                    | Effluent                 | Disturbance (Anthropogenic) | Proxy       |                                                                                                                                      | Jouffray et al. 2015 |
| 234 | Human population density                    | Human population         | Disturbance (Anthropogenic) | Proxy       |                                                                                                                                      | Jouffray et al. 2015 |
| 235 | Urban index                                 | Urban disturbance        | Disturbance (Anthropogenic) | Proxy       | Representation of urban disturbance within a catchment                                                                               | Jouffray et al. 2015 |
| 236 | Point pollution index                       | Pollution                | Disturbance (Anthropogenic) | State/Proxy | Representation of the density of sources of point pollution within a catchment (6 point sources of pollution)                        | Jouffray et al. 2015 |
| 237 | Fragmentation index                         | Stream fragmentation     | Disturbance (Anthropogenic) | Proxy       | Representation of stream fragmentation, which may indicate migration limitations and disruption of the natural flow regime           | Jouffray et al. 2015 |
| 238 | Former pineapple/sugarcane plantation index | Landuse                  | Disturbance (Anthropogenic) | Proxy       | Representation of lands that were formerly pineapple/sugarcane plantations that may contribute to disturbance through legacy effects | Jouffray et al. 2015 |
| 239 | Ditch index                                 | Ditch infrastructure     | Disturbance (Anthropogenic) | Proxy       | Relative density of ditch infrastructure.                                                                                            | Jouffray et al. 2015 |
| 240 | Agricultural index                          | Agricultural disturbance | Disturbance (Anthropogenic) | Proxy       | Representation of agricultural disturbance within a catchment.                                                                       | Jouffray et al. 2015 |
| 241 | Reef zone                                   | Reef zone                | Location & Geomorphology    | State       |                                                                                                                                      | Jouffray et al. 2015 |
| 242 | Hard coral cover                            | Coral cover              | Coral cover                 | State       | Used in PCA to cluster into 3 regimes                                                                                                | Jouffray et al. 2015 |
| 243 | Macroalgae cover                            | Macroalgae               | Algal cover                 | State       | Used in PCA to cluster into 3 regimes                                                                                                | Jouffray et al. 2015 |
| 244 | Turf algae cover                            | Turf                     | Algal cover                 | State       | Used in PCA to cluster into 3 regimes                                                                                                | Jouffray et al. 2015 |
| 245 | CCA cover                                   | CCA                      | Algal cover                 | State       | Used in PCA to cluster into 3 regimes                                                                                                | Jouffray et al. 2015 |
| 246 | Structural complexity                       | Rugosity                 | Location & Geomorphology    | State/Proxy | Used in PCA to cluster into 3 regimes, and a key aspect of reef habitat quality                                                      | Jouffray et al. 2015 |
| 247 | Sand cover                                  | Substrate                | Substrate                   | State       | Used in PCA to cluster into 3 regimes                                                                                                | Jouffray et al. 2015 |

|     |                                            |                        |                             |             |                                                                                                                             |                     |
|-----|--------------------------------------------|------------------------|-----------------------------|-------------|-----------------------------------------------------------------------------------------------------------------------------|---------------------|
| 248 | Connectivity                               | Connectivity           | Connectivity                | Process     | Reef recovery depends on nearby and upstream reefs to provide recruits                                                      | Maynard et al. 2010 |
| 249 | Free from water pollution                  | Pollution              | Disturbance (Anthropogenic) | State/Proxy | Pesticides, nutrients and pathogens increase susceptibility of corals to disease and bleaching, increase algal growth rates | Maynard et al. 2010 |
| 250 | Previous exposure to thermal stress events | Thermal regime         | Physical characteristics    | State/Proxy | Previous exposure, tolerance/quick recovery from thermal stress events suggests same can occur in future                    | Maynard et al. 2010 |
| 251 | Coral cover                                | Coral cover            | Coral cover                 | State/Proxy | Recruitment and intensifies grazing in areas available for algal colonisation                                               | Maynard et al. 2010 |
| 252 | Abundance of resistant/tolerant species    | Resistant corals       | Coral community             | State/Proxy | Massive corals more tolerant of thermal and physical stress                                                                 | Maynard et al. 2010 |
| 253 | Water mixing                               | Mixing                 | Physical characteristics    | Process     | Mixing keeps water temperatures constant and reduces chances of corals in shallow water from heating                        | Maynard et al. 2010 |
| 254 | Free from physical impacts                 | Physical impact        | Disturbance (Physical)      | State/Proxy | Wave action produced by storms can cause breakage of colonies, increase susceptibility to disease and bleaching             | Maynard et al. 2010 |
| 255 | Abundance of mature coral colonies         | Mature coral colonies  | Coral community             | State/Proxy | Large colonies survived long and withstood range of stressors, also likely to produce more recruits                         | Maynard et al. 2010 |
| 256 | Substrate availability                     | Substrate availability | Substrate                   | State/Proxy | Recruits need suitable substrate to settle on and grow                                                                      | Maynard et al. 2010 |
| 257 | Free from anthropogenic physical impacts   | Human impact           | Disturbance (Anthropogenic) | Proxy       | Anchors, fins of snorkelers and divers can damage corals and increase susceptibility to disease and bleaching               | Maynard et al. 2010 |
| 258 | Herbivore abundance                        | Herbivore abundance    | Herbivory                   | State/Proxy | Reduce cover of algae that compete with corals for space                                                                    | Maynard et al. 2010 |
| 259 | Exposure to upwelling                      | Upwelling              | Physical characteristics    | Process     | Cool water reduces temperature stress and alleviate reefs from mass bleaching events                                        | Maynard et al. 2010 |
| 260 | Light reduction                            | Shading                | Physical characteristics    | Proxy       | Reduce thermal stress to coral communities                                                                                  | Maynard et al. 2010 |
| 261 | Free from fishing pressure                 | Fishing pressure       | Disturbance (Anthropogenic) | Proxy       | Fish important for grazing, particularly post-disturbance to free up space for coral recruits                               | Maynard et al. 2010 |
| 262 | Topographic complexity                     | Rugosity               | Location &                  | State/Proxy | Self-shading can reduce light stress that can cause bleaching                                                               | Maynard et al. 2010 |

|     |                          |                           |                             |             |                                                                                                                                         |                        |
|-----|--------------------------|---------------------------|-----------------------------|-------------|-----------------------------------------------------------------------------------------------------------------------------------------|------------------------|
|     |                          |                           | Geomorphology               |             |                                                                                                                                         |                        |
| 263 | Coral submersion         | Reef exposure at low tide | Location & Geomorphology    | Proxy       | Stress to corals exposed to air for long periods can cause mortality                                                                    | Maynard et al. 2010    |
| 264 | Free from sedimentation  | Sedimentation             | Disturbance (Anthropogenic) | State/Proxy | Tolerating sediment requires physiological resources increasing susceptibility to corals to other stressors                             | Maynard et al. 2010    |
| 265 | Absence of bioeroders    | Bioeroder abundance       | Disturbance (Biological)    | State/Proxy | At high abundances can reduce integrity of reef framework, increases susceptibility to physical stresses such as waves caused by storms | Maynard et al. 2010    |
| 266 | Absence of coral disease | Disease                   | Disturbance (Physiological) | State/Proxy | Disease can quickly and kill colonies, and increase susceptibility of corals to other stressors                                         | Maynard et al. 2010    |
| 267 | Resistant coral species  | Resistant corals          | Coral community             | State/Proxy | Confers resistance                                                                                                                      | McClanahan et al. 2012 |
| 268 | Temperature variability  | Thermal regime            | Physical characteristics    | State/Proxy | Previous exposure of corals to different thermal regimes, increase resistance to bleaching                                              | McClanahan et al. 2012 |
| 269 | Nutrients (Pollution)    | Nutrients                 | Disturbance (Anthropogenic) | State/Proxy | Nutrient pollution can reduce coral reef resistance to stress, but depends on species.                                                  | McClanahan et al. 2012 |
| 270 | Sedimentation            | Sedimentation             | Disturbance (Anthropogenic) | State/Proxy | Increased sediment linked to decrease in thermal tolerance of corals.                                                                   | McClanahan et al. 2012 |
| 271 | Coral diversity          | Coral diversity           | Coral community             | State       | Diversity increases resistance but likely depend on species composition. Association unclear.                                           | McClanahan et al. 2012 |
| 272 | Herbivore biomass        | Herbivore biomass         | Herbivory                   | State/Proxy | Reduce algal competition                                                                                                                | McClanahan et al. 2012 |
| 273 | Physical human impacts   | Human impact              | Disturbance (Anthropogenic) | Proxy       | Strong negative relationship between human impacts and corals' ability to resist stressors                                              | McClanahan et al. 2012 |
| 274 | Coral disease            | Disease                   | Disturbance (Physiological) | State/Proxy | Corals more susceptible to bleaching after disease                                                                                      | McClanahan et al. 2012 |
| 275 | Macroalgae cover         | Macroalgae                | Algal cover                 | State/Proxy | Macroalgae reduce coral growth rates                                                                                                    | McClanahan et al. 2012 |
| 276 | Recruitment              | Recruitment               | Recruitment                 | Process     | Coral recruits and small size classes more resistant to bleaching and mortality                                                         | McClanahan et al. 2012 |
| 277 | Fishing pressure         | Fishing pressure          | Disturbance                 | Proxy       | Indirect impact of fishing pressure                                                                                                     | McClanahan et al. 2012 |

|     |                                     |                           |                          |             |                                                                                                                                                                          |                   |
|-----|-------------------------------------|---------------------------|--------------------------|-------------|--------------------------------------------------------------------------------------------------------------------------------------------------------------------------|-------------------|
|     |                                     |                           | (Anthropogenic)          |             |                                                                                                                                                                          |                   |
| 278 | Sea surface temperature             | Temperature               | Physical characteristics | State/Proxy |                                                                                                                                                                          | Mumby et al. 2014 |
| 279 | Live coral cover                    | Coral cover               | Coral cover              | State       |                                                                                                                                                                          | Mumby et al. 2014 |
| 280 | Spawning coral cover                | Coral cover (repro group) | Coral community          | State/Proxy |                                                                                                                                                                          | Mumby et al. 2014 |
| 281 | Brooding coral cover                | Coral cover (repro group) | Coral community          | State/Proxy |                                                                                                                                                                          | Mumby et al. 2014 |
| 282 | Parrotfish biomass                  | Herbivore biomass         | Herbivory                | State/Proxy |                                                                                                                                                                          | Mumby et al. 2014 |
| 283 | Wave exposure index                 | Wave exposure             | Physical characteristics | Proxy       |                                                                                                                                                                          | Mumby et al. 2014 |
| 284 | Hurricane occurrence                | Storm                     | Disturbance (Physical)   | State/Proxy |                                                                                                                                                                          | Mumby et al. 2014 |
| 285 | Hurricane intensity                 | Storm intensity           | Disturbance (Physical)   | State/Proxy |                                                                                                                                                                          | Mumby et al. 2014 |
| 286 | Coral recruitment                   | Recruitment               | Recruitment              | Process     |                                                                                                                                                                          | Mumby et al. 2014 |
| 287 | Coral growth                        | Coral growth              | Growth                   | Process     |                                                                                                                                                                          | Mumby et al. 2014 |
| 288 | Coral reproduction                  | Coral reproduction        | Reproduction             | Process     |                                                                                                                                                                          | Mumby et al. 2014 |
| 289 | Cropped algae                       | Substrate availability    | Substrate                | State/Proxy | Grazing results in cropped algae - corals can recruit to cropped algae includes filamentous, coralline red algae and short turfs <5mm. Proxy for substrate availability. | Mumby et al. 2014 |
| 290 | Site exposure (windward or leeward) | Site exposure             | Location & Geomorphology | State/Proxy |                                                                                                                                                                          | Mumby et al. 2014 |
| 291 | Season                              | Season                    | Physical characteristics | State       |                                                                                                                                                                          | Mumby et al. 2014 |
| 292 | <i>Dictyota</i> growth              | Algal growth              | Growth                   | Process     |                                                                                                                                                                          | Mumby et al. 2014 |

|     |                                                                                             |                 |                          |         |  |                   |
|-----|---------------------------------------------------------------------------------------------|-----------------|--------------------------|---------|--|-------------------|
| 293 | <i>Lobophora</i> growth                                                                     | Algal growth    | Growth                   | Process |  | Mumby et al. 2014 |
| 294 | Competition (corals)                                                                        | Competition     | Competition              | Process |  | Mumby et al. 2014 |
| 295 | Competition (corals and cropped algae)                                                      | Competition     | Competition              | Process |  | Mumby et al. 2014 |
| 296 | Competition (corals and macroalgae): effect of macroalgae on corals                         | Competition     | Competition              | Process |  | Mumby et al. 2014 |
| 297 | Competition (corals and macroalgae): effect of corals on macroalgae                         | Competition     | Competition              | Process |  | Mumby et al. 2014 |
| 298 | Grazing by fishes and impact of fishing                                                     | Herbivory       | Herbivory                | Process |  | Mumby et al. 2014 |
| 299 | Partial-colony mortality of corals                                                          | Coral mortality | Mortality                | Process |  | Mumby et al. 2014 |
| 300 | Whole-colony mortality of juvenile and adult corals                                         | Coral mortality | Mortality                | Process |  | Mumby et al. 2014 |
| 301 | Parrotfish predation on coral recruits                                                      | Corallivory     | Disturbance (Biological) | Process |  | Mumby et al. 2014 |
| 302 | Hurricane impact on juvenile & mature corals (>60 cm <sup>2</sup> ): whole-colony mortality | Coral mortality | Mortality                | Process |  | Mumby et al. 2014 |
| 303 | Hurricane impact on mature corals (>250 cm <sup>2</sup> ): partial-colony mortality         | Coral mortality | Mortality                | Process |  | Mumby et al. 2014 |
| 304 | Hurricane impact on juvenile corals (1-60 cm <sup>2</sup> )                                 | Coral mortality | Mortality                | Process |  | Mumby et al. 2014 |

|     |                                                      |                 |                             |             |                                       |                   |
|-----|------------------------------------------------------|-----------------|-----------------------------|-------------|---------------------------------------|-------------------|
| 305 | Hurricane impact on macroalgae                       | Algal mortality | Mortality                   | Process     |                                       | Mumby et al. 2014 |
| 306 | Bleaching impact on corals: whole-colony mortality   | Coral mortality | Mortality                   | Process     |                                       | Mumby et al. 2014 |
| 307 | Bleaching impact on corals: partial-colony mortality | Coral mortality | Mortality                   | Process     |                                       | Mumby et al. 2014 |
| 308 | Bleaching frequency                                  | Bleaching       | Disturbance (Physiological) | State/Proxy |                                       | Mumby et al. 2014 |
| 309 | Degree heating weeks                                 | Thermal regime  | Physical characteristics    | State/Proxy |                                       | Mumby et al. 2014 |
| 310 | Ungrazable substratum                                | Substrate       | Herbivory                   | Proxy       |                                       | Mumby et al. 2014 |
| 311 | Macroalgae cover                                     | Macroalgae      | Algal cover                 | State/Proxy | Used to indicate coral-algal balance. | Mumby et al. 2014 |
| 312 | Turf cover                                           | Turf            | Algal cover                 | State       |                                       | Mumby et al. 2014 |
| 313 | Wind direction                                       | Wind            | Physical characteristics    | State/Proxy | Used to derive wind exposure          | Mumby et al. 2014 |
| 314 | Wind strength                                        | Wind            | Physical characteristics    | State/Proxy | Used to derive wind exposure          | Mumby et al. 2014 |
| 315 | Fetch                                                | Fetch           | Physical characteristics    | State/Proxy | Used to derive wind exposure          | Mumby et al. 2014 |
| 316 | Rhodolith algae                                      | CCA             | Algal cover                 | State       | Rhodolith belongs under CCA category  | NOAA CCMA-BB      |
| 317 | Crustose coralline algae                             | CCA             | Algal cover                 | State       |                                       | NOAA CCMA-BB      |
| 318 | Cyanobacteria                                        | Cyanobacteria   | Algal cover                 | State       |                                       | NOAA CCMA-BB      |
| 319 | Filamentous algae                                    | Turf            | Algal cover                 | State       | Categorized as turf                   | NOAA CCMA-BB      |
| 320 | Macroalgae                                           | Macroalgae      | Algal cover                 | State       |                                       | NOAA CCMA-BB      |

|     |                           |                               |                             |             |  |              |
|-----|---------------------------|-------------------------------|-----------------------------|-------------|--|--------------|
| 321 | Turf algae                | Turf                          | Algal cover                 | State       |  | NOAA CCMA-BB |
| 322 | Macroalgal canopy height  | Algal height                  | Algal height                | State/Proxy |  | NOAA CCMA-BB |
| 323 | Abiotic - Hard bottom     | Substrate                     | Substrate                   | State       |  | NOAA CCMA-BB |
| 324 | Abiotic - Sand            | Substrate                     | Substrate                   | State       |  | NOAA CCMA-BB |
| 325 | Abiotic - Rubble          | Substrate                     | Substrate                   | State       |  | NOAA CCMA-BB |
| 326 | Abiotic - Fine sediment   | Substrate                     | Substrate                   | State       |  | NOAA CCMA-BB |
| 327 | Abiotic - Rugosity        | Rugosity                      | Location & Geomorphology    | State/Proxy |  | NOAA CCMA-BB |
| 328 | Abiotic - Water Depth     | Depth                         | Location & Geomorphology    | State       |  | NOAA CCMA-BB |
| 329 | Coral cover (Species)     | Coral cover (species)         | Coral cover                 | State       |  | NOAA CCMA-BB |
| 330 | Coral diversity           | Coral diversity               | Coral community             | State       |  | NOAA CCMA-BB |
| 331 | Bleached coral cover      | Bleached coral cover          | Disturbance (Physiological) | State/Proxy |  | NOAA CCMA-BB |
| 332 | Recently dead coral cover | Dead coral cover              | Mortality                   | State/Proxy |  | NOAA CCMA-BB |
| 333 | Seagrass cover            | Seagrass                      | Seagrass                    | State       |  | NOAA CCMA-BB |
| 334 | Seagrass height           | Seagrass                      | Seagrass                    | State       |  | NOAA CCMA-BB |
| 335 | Gorgonian cover           | Other Invertebrates (Sessile) | Other invertebrates         | State       |  | NOAA CCMA-BB |
| 336 | Gorgonian height          | Other Invertebrates (Sessile) | Other invertebrates         | State       |  | NOAA CCMA-BB |
| 337 | Gorgonian abundance       | Other Invertebrates           | Other invertebrates         | State       |  | NOAA CCMA-BB |

|     |                                                        |                               |                             |             |                                                                                          |              |
|-----|--------------------------------------------------------|-------------------------------|-----------------------------|-------------|------------------------------------------------------------------------------------------|--------------|
|     |                                                        | (Sessile)                     |                             |             |                                                                                          |              |
| 338 | Sponge abundance                                       | Other Invertebrates (Sessile) | Other invertebrates         | State       |                                                                                          | NOAA CCMA-BB |
| 339 | Sponge cover                                           | Other Invertebrates (Sessile) | Other invertebrates         | State       |                                                                                          | NOAA CCMA-BB |
| 340 | Sponge canopy height                                   | Other Invertebrates (Sessile) | Other invertebrates         | State       |                                                                                          | NOAA CCMA-BB |
| 341 | Other benthic - Anemonies & hydroids cover             | Other Invertebrates (Sessile) | Other invertebrates         | State       |                                                                                          | NOAA CCMA-BB |
| 342 | Other benthic - Anemonies & hydroids abundance         | Other Invertebrates (Sessile) | Other invertebrates         | State       |                                                                                          | NOAA CCMA-BB |
| 343 | Other benthic - Tunicates & zoanthis                   | Other Invertebrates (Sessile) | Other invertebrates         | State       |                                                                                          | NOAA CCMA-BB |
| 344 | Macro-invertebrates - queen conch abundance & maturity | Motile invertebrates          | Other invertebrates         | State       |                                                                                          | NOAA CCMA-BB |
| 345 | Macro-invertebrates - spiny lobster abundance          | Motile invertebrates          | Other invertebrates         | State       |                                                                                          | NOAA CCMA-BB |
| 346 | Macro-invertebrates - long-spined sea urchin           | Urchin                        | Other invertebrates         | State/Proxy |                                                                                          | NOAA CCMA-BB |
| 347 | Marine debris                                          | Garbage                       | Disturbance (Anthropogenic) | State/Proxy | E.g. cloth, champagne bottle, plastic cylinder, rectangular frame and glass bottles etc. | NOAA CCMA-BB |
| 348 | Fish abundance (species)                               | Fish abundance (species)      | Fish abundance              | State       |                                                                                          | NOAA CCMA-BB |
| 349 | Fish diversity                                         | Fish diversity                | Fish community              | State       |                                                                                          | NOAA CCMA-BB |
| 350 | Fish size class                                        | Fish size                     | Fish size                   | State       |                                                                                          | NOAA CCMA-BB |



|     |                          |                               |                             |             |                                                                                       |              |
|-----|--------------------------|-------------------------------|-----------------------------|-------------|---------------------------------------------------------------------------------------|--------------|
| 351 | Fish biomass (estimated) | Fish biomass                  | Fish biomass                | State/Proxy |                                                                                       | NOAA CCMA-BB |
| 352 | Habitat                  | Habitat                       | Location & Geomorphology    | State       | Hard/soft or mangrove                                                                 | NOAA CCMA-BB |
| 353 | Season                   | Season                        | Physical characteristics    | State       |                                                                                       | NOAA CCMA-BB |
| 354 | Herbivore biomass        | Herbivore biomass             | Herbivory                   | State/Proxy |                                                                                       | NOAA CCMA-BB |
| 355 | Parrotfish biomass       | Herbivore biomass             | Herbivory                   | State/Proxy |                                                                                       | NOAA CCMA-BB |
| 356 | Temperature              | Temperature                   | Physical characteristics    | State/Proxy |                                                                                       | NOAA CCMA-BB |
| 357 | Conductivity             | Conductivity                  | Physical characteristics    | State       |                                                                                       | NOAA CCMA-BB |
| 358 | Turbidity                | Turbidity                     | Physical characteristics    | State/Proxy |                                                                                       | NOAA CCMA-BB |
| 359 | Chlorophyll-a            | Chlorophyll                   | Disturbance (Anthropogenic) | State/Proxy |                                                                                       | NOAA CCMA-BB |
| 360 | Rugosity                 | Rugosity                      | Location & Geomorphology    | State/Proxy |                                                                                       | NOAA CCMA-BB |
| 361 | Hard coral cover         | Coral cover                   | Coral cover                 | State/Proxy | Primary indicator of reef health                                                      | IUCN         |
| 362 | Soft coral cover         | Other Invertebrates (Sessile) | Other invertebrates         | State/Proxy | Competitor, indicate nutrient and wave energy conditions                              | IUCN         |
| 363 | Macroalgal Cover         | Macroalgae                    | Algal cover                 | State/Proxy | Competitor, indicate nutrient/bottom-up/herbivory/top-down processes                  | IUCN         |
| 364 | Turf Algae Cover         | Turf                          | Algal cover                 | State/Proxy | Competitor, indicate nutrient/bottom-up/herbivory/top-down processes                  | IUCN         |
| 365 | CCA Cover                | CCA                           | Algal cover                 | State/Proxy | Indicator for suitable habitat for coral recruitment, consolidation of reef framework | IUCN         |
| 366 | Rubble                   | Substrate                     | Substrate                   | State/Proxy | Indicator of substratum integrity, suitability for coral recruitment and growth       | IUCN         |

|     |                                                         |                    |                          |             |                                                                                                                                                                                           |      |
|-----|---------------------------------------------------------|--------------------|--------------------------|-------------|-------------------------------------------------------------------------------------------------------------------------------------------------------------------------------------------|------|
| 367 | Substrate & Morphology (Topographic complexity - micro) | Rugosity           | Location & Geomorphology | State/Proxy | Relevant to the recruitment of corals.                                                                                                                                                    | IUCN |
| 368 | Substrate & Morphology (Topographic complexity - macro) | Rugosity           | Location & Geomorphology | State/Proxy | Relevant as habitat for bigger organisms                                                                                                                                                  | IUCN |
| 369 | Substrate & Morphology (Sediment texture)               | Sediment size      | Physical characteristics | State/Proxy | Sediment grain size and sorting affects benthic organisms                                                                                                                                 | IUCN |
| 370 | Substrate & Morphology (Sediment layer)                 | Sediment abundance | Physical characteristics | State/Proxy | Depth of sediment layer on hard substrata, particularly in association with algal filaments/turf                                                                                          | IUCN |
| 371 | Cooling & Flushing (Temperature)                        | Temperature        | Physical characteristics | State/Proxy | Primary stressor for bleaching related to climate change                                                                                                                                  | IUCN |
| 372 | Cooling & Flushing (Currents)                           | Current            | Physical characteristics | Proxy       | Currents cause vertical mixing that may reduce surface temperature                                                                                                                        | IUCN |
| 373 | Cooling & Flushing (Wave energy/exposure)               | Wave exposure      | Physical characteristics | Proxy       | Wave energy causes vertical mixing, also represents exposure to weather events                                                                                                            | IUCN |
| 374 | Cooling & Flushing (Proximity to deep water (30-50m))   | Upwelling          | Physical characteristics | State/Proxy | Proximity to deep water enables mixing with cold water by upwelling and waves, currents and exposure. Changed from deep water to upwelling since meant for it to be a proxy of upwelling. | IUCN |
| 375 | Cooling & Flushing (Depth of reef base)                 | Mixing             | Physical characteristics | State/Proxy | Depth of base of reef slope affects potential mixing of deep cool waters. Changed from depth of reef base to mixing because proxy for mixing                                              | IUCN |
| 376 | Shade & Screen (Depth)                                  | Depth              | Location & Geomorphology | State/Proxy | Zonation for reef and community structure, attenuation of temp, light and other variables                                                                                                 | IUCN |
| 377 | Shade & Screen (Visibility (m))                         | Turbidity          | Physical characteristics | State/Proxy | Proxy for turbidity and attenuation of light levels                                                                                                                                       | IUCN |
| 378 | Shade & Screen (Compass direction/aspect)               | Aspect             | Physical characteristics | State/Proxy | Aspect of a reef slope affects the angle of incidence of the sun of reef surface (radiation per area of reef)                                                                             | IUCN |
| 379 | Shade & Screen (Slope)                                  | Slope              | Location &               | State/Proxy | Angle of reef slope affects the angle of incidence of the sun                                                                                                                             | IUCN |

|     |                                                                |                            |                             |             |                                                                                                                            |      |
|-----|----------------------------------------------------------------|----------------------------|-----------------------------|-------------|----------------------------------------------------------------------------------------------------------------------------|------|
|     | (degrees))                                                     |                            | Geomorphology               |             |                                                                                                                            |      |
| 380 | Shade & Screen (Physical shading)                              | Shading                    | Physical characteristics    | Proxy       | Shading can protect corals from stress                                                                                     | IUCN |
| 381 | Shade & Screen (Canopy corals)                                 | Coral cover (growth form)  | Coral community             | State/Proxy | Shading of understory corals by canopy corals (table, staghorn, plates) can protect them from stress                       | IUCN |
| 382 | Extremes & Acclimatization (Temperature variability)           | Thermal regime             | Physical characteristics    | State/Proxy | Variability promotes acclimatization over time, but only up to a certain point, suggests to interpret with local knowledge | IUCN |
| 383 | Extremes & Acclimatization (Exposed low tide)                  | Reef exposure at low tide  | Location & Geomorphology    | Proxy       | Corals exposed to air experience frequent stress and may be more resistant to thermal stress                               | IUCN |
| 384 | Extremes & Acclimatization (Ponding/pooling)                   | Ponding/pooling            | Physical characteristics    | State/Proxy | Restricted bodies of water heat up more and are more stressed                                                              | IUCN |
| 385 | Extremes & Acclimatization (Survival of past bleaching events) | Thermal regime             | Physical characteristics    | State/Proxy | Evidence of corals been bleached and survived, survival indicates acclimatization                                          | IUCN |
| 386 | Bleaching                                                      | Bleaching                  | Disturbance (Physiological) | State/Proxy | Current levels of bleaching                                                                                                | IUCN |
| 387 | Mortality-recent                                               | Dead coral cover           | Mortality                   | State/Proxy | Current levels of mortality - partial/full mortality                                                                       | IUCN |
| 388 | Coral disease                                                  | Disease                    | Disturbance (Physiological) | State/Proxy | Percent corals showing disease conditions                                                                                  | IUCN |
| 389 | Mortality-old                                                  | Dead coral cover           | Coral cover                 | State       |                                                                                                                            | IUCN |
| 390 | Recovery-old                                                   | Dead coral cover           | Coral cover                 | State       |                                                                                                                            | IUCN |
| 391 | Coral population structure                                     | Coral population structure | Coral community             | Proxy       | Represents succession of coral community as documented by the next 4 variables.                                            | IUCN |
| 392 | Population Biology                                             | Juvenile corals            | Recruitment                 | State/Proxy | Estimated number of recruits <2-3cm per square meter                                                                       | IUCN |

|     |                                                                                                                  |                           |                          |             |                                                                                                                         |      |
|-----|------------------------------------------------------------------------------------------------------------------|---------------------------|--------------------------|-------------|-------------------------------------------------------------------------------------------------------------------------|------|
|     | (Recruitment)                                                                                                    |                           |                          |             |                                                                                                                         |      |
| 393 | Population Biology (Fragmentation)                                                                               | Fragmentation             | Reproduction             | State/Proxy | Estimated contribution of fragmentation in producing new colonies from 5-20cm                                           | IUCN |
| 394 | Population Biology (Dominant size class)                                                                         | Coral size                | Coral community          | State/Proxy | Estimate dominance in coral community by size class, indicating successional stage of community                         | IUCN |
| 395 | Population Biology (Largest corals)                                                                              | Coral size                | Coral community          | State/Proxy | Largest corals at a site indicate suitability of site and degree of env. Stability/community persistence                | IUCN |
| 396 | Positive coral associates (Obligate feeders)                                                                     | Coral-dependent organisms | Organisms (Unharmful)    | State/Proxy | Abundance and diversity of obligate coral feeders indicative of health of coral colonies and complexity of interactions | IUCN |
| 397 | Positive coral associates (Branching residents (Abundance and diversity of fish/crustacean residents in corals)) | Coral-dependent organisms | Organisms (Unharmful)    | State/Proxy | Abundance and diversity of fish and invertebrate residents are indicative of health and complexity of interactions      | IUCN |
| 398 | Negative coral associates (Competitors)                                                                          | Competitor abundance      | Competition              | State/Proxy | Abundance and diversity of coral competitors indicative of inhibiting factors to coral growth and recovery              | IUCN |
| 399 | Negative coral associates (Bioeroders (internal))                                                                | Bioeroder abundance       | Disturbance (Biological) | State/Proxy | Urchins, nonfish - inhibiting factors to coral growth and recovery                                                      | IUCN |
| 400 | Negative coral associates (Bioeroders (external))                                                                | Bioeroder abundance       | Disturbance (Biological) | State/Proxy | Sponges, worms - inhibiting factors to coral growth and recovery                                                        | IUCN |
| 401 | Negative coral associates (Corallivores (negative))                                                              | Corallivores              | Disturbance (Biological) | State/Proxy | Indicative to additional mortality to coral colonies                                                                    | IUCN |
| 402 | Herbivore diversity                                                                                              | Herbivore diversity       | Fish community           | State/Proxy | Overall critical for suppressing algal growth and inhibiting effects on corals                                          | IUCN |
| 403 | Herbivore abundance (Excavators)                                                                                 | Herbivore abundance       | Herbivory                | State/Proxy | Control on algal growth                                                                                                 | IUCN |
| 404 | Herbivore abundance (Scrapers)                                                                                   | Herbivore abundance       | Herbivory                | State/Proxy | Control on macroalgal fronds                                                                                            | IUCN |
| 405 | Herbivore abundance                                                                                              | Herbivore                 | Herbivory                | State/Proxy | Control on epilithic turf algae                                                                                         | IUCN |

|     |                                                |                      |                             |             |                                                                              |      |
|-----|------------------------------------------------|----------------------|-----------------------------|-------------|------------------------------------------------------------------------------|------|
|     | (Grazers/browsers)                             | abundance            |                             |             |                                                                              |      |
| 406 | Top Predators (Piscivores)                     | Fish abundance (key) | Fish abundance              | State       |                                                                              | IUCN |
| 407 | Dispersal (self-seeding)                       | Larval supply        | Connectivity                | Process     | Recruitment of new corals driven more by self-seeding                        | IUCN |
| 408 | Dispersal (local-seeding)                      | Larval supply        | Connectivity                | Process     | Larval density decreases with distance from source                           | IUCN |
| 409 | Dispersal (distant-seeding)                    | Larval supply        | Connectivity                | Process     | Larval density decreases with distance from source                           | IUCN |
| 410 | Transport (Currents)                           | Current              | Connectivity                | Proxy       |                                                                              | IUCN |
| 411 | Transport (Dispersal barrier)                  | Dispersal barrier    | Location & Geomorphology    | State/Proxy | Barriers reduce larvae flow                                                  | IUCN |
| 412 | Water (Nutrient input)                         | Nutrients            | Disturbance (Anthropogenic) | State/Proxy | Nutrient enhancement alter reef processes                                    | IUCN |
| 413 | Water (Pollution (Chemical))                   | Pollution            | Disturbance (Anthropogenic) | State/Proxy | Reduce ability to withstand other stresses                                   | IUCN |
| 414 | Substrate (Pollution (Solid))                  | Garbage              | Disturbance (Anthropogenic) | State/Proxy | Unsuitable for coral growth and recruitment                                  | IUCN |
| 415 | Turbidity/sedimentation                        | Turbidity            | Physical characteristics    | State/Proxy | Anthropogenic enhanced turbidity and sedimentation negatively affects corals | IUCN |
| 416 | Anthropogenic (Physical damage)                | Human impact         | Disturbance (Anthropogenic) | Proxy       | Mortality/inhibits recovery                                                  | IUCN |
| 417 | Fishing pressure                               | Fishing pressure     | Disturbance (Anthropogenic) | Proxy       | Overfishing causes reef degradation                                          | IUCN |
| 418 | Destructive fishing                            | Destructive fishing  | Disturbance (Physical)      | State/Proxy | Physical damage to site, alters balance of fish dynamics                     | IUCN |
| 419 | Connectivity (Dispersal barrier) Anthropogenic | Dispersal barrier    | Disturbance (Anthropogenic) | State/Proxy | Construction that affects connectivity                                       | IUCN |

|     |                                                                                                    |                      |                             |             |                                                                             |            |
|-----|----------------------------------------------------------------------------------------------------|----------------------|-----------------------------|-------------|-----------------------------------------------------------------------------|------------|
| 420 | Management (Biodiversity)                                                                          | Management           | Management Status           | State/Proxy | Protection of biodiversity                                                  | IUCN       |
| 421 | Management (Environmental quality)                                                                 | Management           | Management Status           | State/Proxy | Protection from extraction of resources by fishing or other activities      | IUCN       |
| 422 | Management (Resources)                                                                             | Management           | Management Status           | State/Proxy | Limitation of human activities that degrade the environment, e.g. pollution | IUCN       |
| 423 | Depth                                                                                              | Depth                | Location & Geomorphology    | State       |                                                                             | Reef Check |
| 424 | Latitude and longitude                                                                             | Latitude/Longitude   | Location & Geomorphology    | State       |                                                                             | Reef Check |
| 425 | Site exposure (windward or leeward)                                                                | Site exposure        | Location & Geomorphology    | State/Proxy |                                                                             | Reef Check |
| 426 | Impacts - Blast/poison/net aquarium fishing/collecting invertebrates for food/curio sales/tourists | Human impact         | Disturbance (Anthropogenic) | Proxy       |                                                                             | Reef Check |
| 427 | Impacts - Sewage/industrial pollution                                                              | Pollution            | Disturbance (Anthropogenic) | State/Proxy |                                                                             | Reef Check |
| 428 | Impacts - Commercial fishing                                                                       | Fishing pressure     | Disturbance (Anthropogenic) | Proxy       |                                                                             | Reef Check |
| 429 | Number of yachts/motorboats                                                                        | Human impact         | Disturbance (Anthropogenic) | Proxy       |                                                                             | Reef Check |
| 430 | Management                                                                                         | Management           | Management Status           | State/Proxy |                                                                             | Reef Check |
| 431 | Fish abundance (Selected species)                                                                  | Fish abundance (key) | Fish abundance              | State       |                                                                             | Reef Check |
| 432 | Fish size class distribution (Selected)                                                            | Fish size (key)      | Fish size                   | State       |                                                                             | Reef Check |

|     |                       |                                  |                                |             |                                                          |            |
|-----|-----------------------|----------------------------------|--------------------------------|-------------|----------------------------------------------------------|------------|
|     | species)              |                                  |                                |             |                                                          |            |
| 433 | Urchin                | Urchin                           | Herbivory                      | State/Proxy | Important algae grazers                                  | Reef Check |
| 434 | COTS abundance        | COTS                             | Disturbance<br>(Biological)    | State/Proxy | Coral damage                                             | Reef Check |
| 435 | Triton abundance      | Motile<br>invertebrates          | Other invertebrates            | State       |                                                          | Reef Check |
| 436 | Banded coral shrimp   | Motile<br>invertebrates          | Other invertebrates            | State       |                                                          | Reef Check |
| 437 | Lobster abundance     | Motile<br>invertebrates          | Other invertebrates            | State/Proxy | Usually seen only on reefs that have not been overfished | Reef Check |
| 438 | Giant clam abundance  | Motile<br>invertebrates          | Other invertebrates            | State/Proxy | Usually seen only on reefs that have not been overfished | Reef Check |
| 439 | Triton abundance      | Motile<br>invertebrates          | Other invertebrates            | State/Proxy | Usually seen only on reefs that have not been overfished | Reef Check |
| 440 | Gorgonian             | Other Invertebrates<br>(Sessile) | Other invertebrates            | State       |                                                          | Reef Check |
| 441 | Cowries abundance     | Motile<br>invertebrates          | Other invertebrates            | State       |                                                          | Reef Check |
| 442 | Coral disease         | Disease                          | Disturbance<br>(Physiological) | State/Proxy |                                                          | Reef Check |
| 443 | Bleached coral cover  | Bleached coral<br>cover          | Disturbance<br>(Physiological) | State/Proxy |                                                          | Reef Check |
| 444 | Coral cover (species) | Coral cover<br>(species)         | Coral cover                    | State       |                                                          | Reef Check |
| 445 | Coral diversity       | Coral diversity                  | Coral community                | State       |                                                          | Reef Check |
| 446 | Soft coral cover      | Other Invertebrates<br>(Sessile) | Other invertebrates            | State       |                                                          | Reef Check |

|     |                                                                               |                               |                          |             |                                                                                                                                                                                                                   |                      |
|-----|-------------------------------------------------------------------------------|-------------------------------|--------------------------|-------------|-------------------------------------------------------------------------------------------------------------------------------------------------------------------------------------------------------------------|----------------------|
| 447 | Recently killed coral                                                         | Dead coral cover              | Mortality                | State/Proxy |                                                                                                                                                                                                                   | Reef Check           |
| 448 | Nutrient indicator algae                                                      | Macroalgae                    | Algal cover              | State/Proxy | Macroalgae that indicates nutrient presence. All algae except coralline, calcareous ( <i>Halimeda</i> ) and turf                                                                                                  | Reef Check           |
| 449 | Turf algae                                                                    | Turf                          | Algal cover              | State       |                                                                                                                                                                                                                   | Reef Check           |
| 450 | CCA algae                                                                     | CCA                           | Algal cover              | State       |                                                                                                                                                                                                                   | Reef Check           |
| 451 | Sponge                                                                        | Other Invertebrates (Sessile) | Other invertebrates      | State       |                                                                                                                                                                                                                   | Reef Check           |
| 452 | Rock                                                                          | Substrate                     | Substrate                | State       |                                                                                                                                                                                                                   | Reef Check           |
| 453 | Rubble                                                                        | Substrate                     | Substrate                | State       |                                                                                                                                                                                                                   | Reef Check           |
| 454 | Sand                                                                          | Substrate                     | Substrate                | State       |                                                                                                                                                                                                                   | Reef Check           |
| 455 | Silt/Clay                                                                     | Substrate                     | Substrate                | State       |                                                                                                                                                                                                                   | Reef Check           |
| 456 | Other organisms (sea anemones, tunicates, gorgonians or non-living substrate) | Other Invertebrates (Sessile) | Other invertebrates      | State       |                                                                                                                                                                                                                   | Reef Check           |
| 457 | Physical damage                                                               | Physical impact               | Disturbance (Physical)   | State/Proxy |                                                                                                                                                                                                                   | Reef Check           |
| 458 | Reef zone                                                                     | Reef zone                     | Location & Geomorphology | State       |                                                                                                                                                                                                                   | Reef Check           |
| 459 | Habitat                                                                       | Habitat                       | Location & Geomorphology | State       |                                                                                                                                                                                                                   | Reef Check           |
| 460 | Live coral abundance                                                          | Coral cover                   | Coral cover              | State/Proxy | Indicative of past stress tolerance; more corals will produce more gametes. Used total coral cover, not coral size, coral genus in S2 because it is only used to prove that depth should be included in the RSRI. | Rowlands et al. 2012 |
| 461 | Habitat                                                                       | Habitat                       | Location & Geomorphology | State       |                                                                                                                                                                                                                   | Rowlands et al. 2012 |



|     |                                           |                        |                             |             |                                                                                                                                                                                                                                                                                                                                                                        |                      |
|-----|-------------------------------------------|------------------------|-----------------------------|-------------|------------------------------------------------------------------------------------------------------------------------------------------------------------------------------------------------------------------------------------------------------------------------------------------------------------------------------------------------------------------------|----------------------|
| 462 | Framework abundance index                 | Substrate availability | Substrate                   | Proxy       | Proportion of grid cell occupied by coral framework (alive/dead) suitable for coral recruitment. When reef framework is abundant close to source patch, more likely to be colonized.                                                                                                                                                                                   | Rowlands et al. 2012 |
| 463 | Sand, rubble, sediment                    | Substrate              | Substrate                   | State       |                                                                                                                                                                                                                                                                                                                                                                        | Rowlands et al. 2012 |
| 464 | Macroalgae                                | Macroalgae             | Algal cover                 | State       |                                                                                                                                                                                                                                                                                                                                                                        | Rowlands et al. 2012 |
| 465 | Water depth variability                   | Depth variability      | Physical characteristics    | State/Proxy | Species show different stress tolerance, cooler regime found in deeper areas yielding a thermal stress refuge. Ratio of SD of water depth at site to maximum SD of water depth for 5 study sites                                                                                                                                                                       | Rowlands et al. 2012 |
| 466 | Water depth                               | Depth                  | Location & Geomorphology    | State       |                                                                                                                                                                                                                                                                                                                                                                        | Rowlands et al. 2012 |
| 467 | Fishing intensity                         | Fishing pressure       | Disturbance (Anthropogenic) | Proxy       | Removal of herbivorous fish affects coral-algal balance; removal of predators alters dynamics and food web structure. Combine industrial and traditional fishing pressure                                                                                                                                                                                              | Rowlands et al. 2012 |
| 468 | Industry and development                  | Development index      | Disturbance (Anthropogenic) | Proxy       | Light proximity index, with assumption that reefs are more impacted if close to light source at night. Nutrient enrichment, pollution, desalination outflow, oil cause stress, reduced productivity or death. Development (industrial and residential) have harmful impacts to corals across range of distances from source, typically most harmful to close proximity | Rowlands et al. 2012 |
| 469 | Thermal stress index                      | Thermal regime         | Disturbance (Physiological) | Proxy       | Warming waters cause stress, reduced productivity and ultimately death through coral bleaching                                                                                                                                                                                                                                                                         | Rowlands et al. 2012 |
| 470 | Sea surface temperature                   | Temperature            | Physical characteristics    | State/Proxy | To calculate thermal stress index                                                                                                                                                                                                                                                                                                                                      | Rowlands et al. 2012 |
| 471 | Degree heating days                       | Thermal regime         | Physical characteristics    | State/Proxy | To calculate thermal stress index, considered a measure of chronic thermal stress, the slow exposure of corals to abnormally high temperature                                                                                                                                                                                                                          | Rowlands et al. 2012 |
| 472 | Heating rate                              | Heating rate           | Physical characteristics    | Process     | To calculate thermal stress index                                                                                                                                                                                                                                                                                                                                      | Rowlands et al. 2012 |
| 473 | High recovery rate from past disturbances | Recovery rate          | Coral community             | Process     | Past recovery an indicator of future recovery                                                                                                                                                                                                                                                                                                                          | Weeks & Jupiter 2013 |
| 474 | Coral population                          | Coral population       | Coral community             | State/Proxy | Proxy (juvenile coral density). High abundance of mature colonies + strong                                                                                                                                                                                                                                                                                             | Weeks & Jupiter 2013 |

|     |                                                      |                        |                             |             |                                                                                                                                                                                                                 |                      |
|-----|------------------------------------------------------|------------------------|-----------------------------|-------------|-----------------------------------------------------------------------------------------------------------------------------------------------------------------------------------------------------------------|----------------------|
|     | structure                                            | structure              |                             |             | recruitment an indicator of strong future recovery                                                                                                                                                              |                      |
| 475 | Juvenile coral density                               | Juvenile corals        | Recruitment                 | State/Proxy | Evidence of strong coral recruitment are likely to demonstrate high potential to withstand and recover from disturbance                                                                                         | Weeks & Jupiter 2013 |
| 476 | Connectivity                                         | Connectivity           | Connectivity                | Process     | Proxy: Juvenile coral density. Protected sites well connected to each other may provide larvae to promote recovery                                                                                              | Weeks & Jupiter 2013 |
| 477 | Substrate availability                               | Substrate availability | Substrate                   | State/Proxy | High availability of suitable substrate on which coral recruits can settle likely to promote recovery                                                                                                           | Weeks & Jupiter 2013 |
| 478 | Herbivore abundance                                  | Herbivore abundance    | Herbivory                   | State/Proxy | Proxy: Herbivore biomass. High abundance of herbivores likely to reduce harmful coral-algal interactions and provide substrate for coral recruits to settle                                                     | Weeks & Jupiter 2013 |
| 479 | Herbivore functional diversity                       | Herbivore diversity    | Fish community              | State/Proxy | Measure: Pielou's evenness of herbivore functional groups present. High functional diversity of herbivores likely to reduce harmful coral-algal interactions and provide substrate for coral recruits to settle | Weeks & Jupiter 2013 |
| 480 | Abundance of bioeroders                              | Bioeroder abundance    | Disturbance (Biological)    | State/Proxy | Reefs with low abundance of bioeroders are more resistant to other forms of disturbance                                                                                                                         | Weeks & Jupiter 2013 |
| 481 | Absense of coral disease                             | Disease                | Disturbance (Physiological) | State/Proxy | Low disease likely to be more resistant to other forms of disturbance                                                                                                                                           | Weeks & Jupiter 2013 |
| 482 | Fish diversity                                       | Fish diversity         | Fish community              | State/Proxy | High fish diversity & functional diversity likely to demonstrate higher resilience                                                                                                                              | Weeks & Jupiter 2013 |
| 483 | Fish size                                            | Fish size              | Fish size                   | State       |                                                                                                                                                                                                                 | Weeks & Jupiter 2013 |
| 484 | Fish abundance                                       | Total fish abundance   | Fish abundance              | State       |                                                                                                                                                                                                                 | Weeks & Jupiter 2013 |
| 485 | Fish biomass (estimated)                             | Fish biomass           | Fish biomass                | State/Proxy |                                                                                                                                                                                                                 | Weeks & Jupiter 2013 |
| 486 | Coral diversity                                      | Coral diversity        | Coral community             | State       | High coral diversity likely to demonstrate higher resilience                                                                                                                                                    | Weeks & Jupiter 2013 |
| 487 | Coral cover                                          | Coral cover            | Coral cover                 | State       |                                                                                                                                                                                                                 | Weeks & Jupiter 2013 |
| 488 | Coral community dominated by resistant/tolerant taxa | Resistant corals       | Coral community             | State/Proxy | More resistant to disturbance                                                                                                                                                                                   | Weeks & Jupiter 2013 |

|     |                                                                    |                           |                             |             |                                                                                                                                                                                      |                      |
|-----|--------------------------------------------------------------------|---------------------------|-----------------------------|-------------|--------------------------------------------------------------------------------------------------------------------------------------------------------------------------------------|----------------------|
| 489 | Fishing pressure                                                   | Fishing pressure          | Disturbance (Anthropogenic) | Proxy       | Low fishing pressure/not targetting herbivores likely to show higher resilience                                                                                                      | Weeks & Jupiter 2013 |
| 490 | Anthropogenic physical impacts                                     | Human impact              | Disturbance (Anthropogenic) | Proxy       | Reefs not subjective to pressure are likely to have higher resilience                                                                                                                | Weeks & Jupiter 2013 |
| 491 | Water quality                                                      | Water quality             | Disturbance (Anthropogenic) | State/Proxy | Water pollution and unnatural levels of nutrients impact resistance and recovery                                                                                                     | Weeks & Jupiter 2013 |
| 492 | Reef aspect                                                        | Aspect                    | Physical characteristics    | State/Proxy | Sites angled away from sunlight may be less exposed to thermal stress                                                                                                                | Weeks & Jupiter 2013 |
| 493 | Depth                                                              | Depth                     | Location & Geomorphology    | State/Proxy | Deeper sites cooler, but shallow sites more acclimated to hot temperatures                                                                                                           | Weeks & Jupiter 2013 |
| 494 | Reef exposure at low tide                                          | Reef exposure at low tide | Location & Geomorphology    | Proxy       | Proxy: Reef exposure at low tide. Reefs routinely exposed are better adapted to thermal stress, but extremely low tides with high noon irradiances may result in bleaching mortality | Weeks & Jupiter 2013 |
| 495 | Proximity to upwelling or exposure to strong currents              | Upwelling                 | Physical characteristics    | State/Proxy | Sites influenced by upwelling may not experience as severe positive temperature anomalies                                                                                            | Weeks & Jupiter 2013 |
| 496 | Shading from high, steep sided islands or reef topography          | Shading                   | Physical characteristics    | Proxy       | Shaded sites may not experience as severe positive temperature anomalies                                                                                                             | Weeks & Jupiter 2013 |
| 497 | Turbid water                                                       | Turbidity                 | Physical characteristics    | State/Proxy |                                                                                                                                                                                      | Weeks & Jupiter 2013 |
| 498 | Natural physical impacts                                           | Physical impact           | Disturbance (Physical)      | State/Proxy | Sites not frequently physically disturbed likely to show higher resilience                                                                                                           | Weeks & Jupiter 2013 |
| 499 | Resistance (physical factors that reduce temp. stress) - Exchange  | Exchange                  | Physical characteristics    | Process     | Warm water replaced with cooler oceanic water                                                                                                                                        | West & Salm 2003     |
| 500 | Resistance (physical factors that reduce temp. stress) - Upwelling | Upwelling                 | Physical characteristics    | Process     |                                                                                                                                                                                      | West & Salm 2003     |

|     |                                                                                               |               |                          |             |                                                                               |                  |
|-----|-----------------------------------------------------------------------------------------------|---------------|--------------------------|-------------|-------------------------------------------------------------------------------|------------------|
| 501 | Resistance (physical factors that reduce temp. stress) - Areas adjacent to deep water         | Deep water    | Physical characteristics | State/Proxy |                                                                               | West & Salm 2003 |
| 502 | Resistance (physical factors that reduce temp. stress) - Wind-driven mixing                   | Mixing        | Physical characteristics | Process     |                                                                               | West & Salm 2003 |
| 503 | Resistance (physical factors that enhance water movement and flush toxins) - Fast currents    | Current       | Physical characteristics | Proxy       | Eddies, tidal and ocean currents, gyres                                       | West & Salm 2003 |
| 504 | Resistance (physical factors that enhance water movement and flush toxins) - Topography       | Topography    | Location & Geomorphology | State/Proxy | Does not refer to rugosity, but of geological structures promoting water flow | West & Salm 2003 |
| 505 | Resistance (physical factors that enhance water movement and flush toxins) - High wave energy | Wave exposure | Physical characteristics | Proxy       |                                                                               | West & Salm 2003 |
| 506 | Resistance (physical factors that enhance water movement and flush toxins) - Tidal range      | Tide          | Physical characteristics | State/Proxy |                                                                               | West & Salm 2003 |
| 507 | Resistance (physical factors that enhance water movement and flush toxins) - Wind             | Wind          | Physical characteristics | State/Proxy |                                                                               | West & Salm 2003 |
| 508 | Resistance (physical factors that decrease light                                              | Shading       | Physical characteristics | Proxy       |                                                                               | West & Salm 2003 |

|     |                                                                                                |                           |                             |             |  |                  |
|-----|------------------------------------------------------------------------------------------------|---------------------------|-----------------------------|-------------|--|------------------|
|     | stress) - Shade                                                                                |                           |                             |             |  |                  |
| 509 | Resistance (physical factors that decrease light stress) - Aspect relative to the sun          | Aspect                    | Physical characteristics    | State/Proxy |  | West & Salm 2003 |
| 510 | Resistance (physical factors that decrease light stress) - Slope                               | Slope                     | Location & Geomorphology    | State/Proxy |  | West & Salm 2003 |
| 511 | Resistance (physical factors that decrease light stress) - Turbidity                           | Turbidity                 | Physical characteristics    | State/Proxy |  | West & Salm 2003 |
| 512 | Resistance (physical factors that decrease light stress) - Absorption/CDOM                     | CDOM                      | Disturbance (Anthropogenic) | State/Proxy |  | West & Salm 2003 |
| 513 | Resistance (physical factors that decrease light stress) - Cloud cover                         | Cloud cover               | Physical characteristics    | State/Proxy |  | West & Salm 2003 |
| 514 | Resistance (factors that correlate with bleaching tolerance) - Temperature variability         | Thermal regime            | Physical characteristics    | State/Proxy |  | West & Salm 2003 |
| 515 | Resistance (factors that correlate with bleaching tolerance) - Emergence at low tide           | Reef exposure at low tide | Location & Geomorphology    | Proxy       |  | West & Salm 2003 |
| 516 | Resistance (indirect indicators of bleaching tolerance) - Broad size and species distributions | Coral size                | Coral community             | State/Proxy |  | West & Salm 2003 |
| 517 | Resistance (indirect indicators of bleaching tolerance) - Areas of                             | Coral cover               | Coral cover                 | State/Proxy |  | West & Salm 2003 |

|     |                                                                                                        |                        |                          |             |  |                  |
|-----|--------------------------------------------------------------------------------------------------------|------------------------|--------------------------|-------------|--|------------------|
|     | greatest remaining coral cover                                                                         |                        |                          |             |  |                  |
| 518 | Resistance (indirect indicators of bleaching tolerance) - History of corals surviving bleaching events | Thermal regime         | Physical characteristics | State/Proxy |  | West & Salm 2003 |
| 519 | Resilience (Intrinsic) - Availability and abundance of local larvae                                    | Reproduction           | Reproduction             | Process     |  | West & Salm 2003 |
| 520 | Resilience (Intrinsic) - Recruitment success                                                           | Recruitment            | Recruitment              | Process     |  | West & Salm 2003 |
| 521 | Resilience (Intrinsic) - Low abundance of bioeroders, corallivores, diseases                           | Harmful organisms      | Organisms (Harmful)      | State/Proxy |  | West & Salm 2003 |
| 522 | Resilience (Intrinsic) - Diverse well-balanced community to prepare substratum for coral settlement    | Substrate availability | Substrate                | State/Proxy |  | West & Salm 2003 |
| 523 | Resilience (Extrinsic) - Good potential for recovery because of effective management regime            | Management             | Management Status        | State/Proxy |  | West & Salm 2003 |
| 524 | Resilience (Extrinsic) - Connectivity by currents                                                      | Current                | Connectivity             | Proxy       |  | West & Salm 2003 |
| 525 | Resilience (Extrinsic) - Concentration of larval supply                                                | Larval supply          | Connectivity             | Process     |  | West & Salm 2003 |

## References

1. Atlantic and Gulf Rapid Reef Assessment (AGGRA), available from: <http://www.agrra.org/>
2. Australia Institute of Marine Science (AIMS) Long-term monitoring of the Great Barrier Reef (LTMP). Standard Operation Procedures 3, 9 and 10, available from: <http://www.aims.gov.au/docs/research/monitoring/reef/reef-monitoring.html>
3. Bruckner AW. Static measurements of the resilience of Caribbean coral populations. *Rev Biol Trop*. 2012;60:39-57.
4. CARICOMP. 2001. The Caribbean Coastal Marine Productivity Program (CARICOMP). *Bulletin of Marine Science* 69, 819-829.
5. Cinner JE, Huchery C, Darling ES, Humphries AT, Graham NAJ, Hicks CC, et al. Evaluating Social and Ecological Vulnerability of Coral Reef Fisheries to Climate Change. *PLoS ONE*. 2013;8(9):e74321.
6. Hawai'i Coral Reef Assessment and Monitoring Program (CRAMP), available from: <http://cramp.wcc.hawaii.edu/>
7. Graham NAJ, Jennings S, MacNeil MA, Mouillot D, Wilson SK. Predicting climate-driven regime shifts versus rebound potential in coral reefs. *Nature*. 2015;518(7537):94-7.
8. Coral Reef Evaluation and Monitoring Project (CREMP), available from: <http://myfwc.com/research/habitat/coral/cremp/>
9. Jouffray JB, Nystrom M, Norstrom AV, Williams ID, Wedding LM, Kittinger JN, et al. Identifying multiple coral reef regimes and their drivers across the Hawaiian archipelago. *Philosophical Transactions of the Royal Society B-Biological Sciences*. 2015;370(1659).
10. Maynard JA, Marshall PA, Johnson JE, Harman S. Building resilience into practical conservation: identifying local management responses to global climate change in the southern Great Barrier Reef. *Coral Reefs*. 2010;29(2):381-91.
11. McClanahan TR, Campbell SJ, Darling ES, Eakin CM, Heron SF, Jupiter SD, et al. Prioritizing key resilience indicators to support coral reef management in a changing climate. *PLoS ONE*. 2012;7(8):e42884.
12. Mumby PJ, Wolff NH, Bozec YM, Chollett I, Halloran P. Operationalizing the resilience of coral reefs in an era of climate change. *Conservation Letters*. 2014;4(7):1-12.
13. NOAA Center for Coastal Monitoring and Assessment Biogeographic Branch – Caribbean Coral Reef Ecosystem Monitoring Project (NOAA CCMA-BB), available from: [http://ccma.nos.noaa.gov/ecosystems/coralreef/reef\\_fish/protocols.aspx](http://ccma.nos.noaa.gov/ecosystems/coralreef/reef_fish/protocols.aspx)
14. Obura D, Grimsditch G. Resilience assessment of coral reefs: assessment protocol for coral reefs, focusing on coral bleaching and thermal stress. Gland, Switzerland: IUCN; 2009.
15. Hodgson G, Hill J, Kiene W, Maun L, Mihaly J, Liebeler J, et al. Reef check instruction manual: A guide to reef check coral reef monitoring 2006. 87 p.
16. Rowlands G, Purkis S, Riegl B, Metsamaa L, Bruckner A, Renaud P. Satellite imaging coral reef resilience at regional scale. A case-study from Saudi Arabia. *Mar Pollut Bull*. 2012;64(6):1222-37.
17. Weeks R, Jupiter SD. Adaptive Co-management of a Marine Protected Area Network in Fiji. *Conserv Biol*. 2013;27(6):1234-44.
18. West JM, Salm RV. Resistance and resilience to coral bleaching: implications for coral reef conservation and management. *Conserv Biol*. 2003;17(4):956-67.
