# Supplementary material for: The influence of resilience-based management on coral reef monitoring: A systematic review
Source: PLOS journal article supplement (doi:10.1371/journal.pone.0172064), 2017-02-10
Supplement: S4 (10.1371/journal.pone.0172064.s004) [file journal.pone.0172064.s004]

**S3A Table. Results from 2-way permutational MANOVA testing for differences between metrics used by study groups and location. Fixed factor: group and location.**

| <b>Source of variation</b> | <b>df</b> | <b>SS</b> | <b>MS</b> | <b>Pseudo-F</b> | <b>P(perm)</b> |
|----------------------------|-----------|-----------|-----------|-----------------|----------------|
| Group                      | 1         | 6324.8    | 6324.8    | 1.8631          | 0.001          |
| Location                   | 3         | 11637     | 3879.1    | 1.1427          | 0.184          |
| Goal x Location            | 2         | 6560.9    | 3280.4    | 0.96635         | 0.534          |
| Residual                   | 16        | 37341     | 3394.7    |                 |                |

**S3B Table. Results from PERMDISP test of homogeneity of dispersions in the metrics used by monitoring and resilience assessments. Fixed factor: group.**

| <b>Group</b> | <b>n</b> | <b>Average</b> | <b>SE</b> | <b>Pseudo-F</b> | <b>P(perm)</b> |
|--------------|----------|----------------|-----------|-----------------|----------------|
| Monitoring   | 6        | 47.12          | 2.1289    | 33.529          | 0.0007         |
| Resilience   | 12       | 59.121         | 1.026     |                 |                |
